# Supplementary material for: Economic Feasibility Study of a Carbon Capture and Storage (CCS) Integration Project in an Oil-Driven Economy: The Case of the State of Kuwait
Source: MDPI journal article supplement (doi:10.3390/ijerph19116490), 2022-05-26
Supplement: s1 [file s1]

**Supplementary Material File:**

This file contains the associated data and complementary material as referred to in the article.

Table S1. Profile of Worldwide Large Power Sector Carbon Dioxide (CO<sub>2</sub>) stationary sources emitting more than 0.1 Mt CO<sub>2</sub> yr<sup>-1</sup>\*. Adapted from IPCC (2005) and Al-Salem (2015).

| Process                  | CO <sub>2</sub> concentration in gas stream (vol.%) | Number of sources | Emission (Million tpa) | % of total emission | Average emission per source (MtCO <sub>2</sub> per source) |
|--------------------------|-----------------------------------------------------|-------------------|------------------------|---------------------|------------------------------------------------------------|
| Power Sector             |                                                     |                   |                        |                     |                                                            |
| Coal                     | 12 to 15                                            | 2,025             | 7,984                  | 59.69               | 3.94                                                       |
| Natural gas              | 7-10                                                | 1,728             | 1,511                  | 11.3                | 0.77-1.01                                                  |
| Fuel oil                 | 3-8                                                 | 1,108             | 980                    | 10.51               | 0.55-1.27                                                  |
| Other fuels <sup>+</sup> | NA                                                  | 79                | 61                     | 0.45                | 0.77                                                       |
| Hydrogen                 | NA                                                  | 2                 | 3                      | 0.02                | 1.27                                                       |

\*The definition of large sources is set as a carbon emitter of over 0.1 Mt CO<sub>2</sub> yr<sup>-1</sup> (IPCC, 2005); <sup>+</sup>Other fuels include: Other gases or oil, digester gas and landfill gas.

Table S2. Profile of Carbon Sources Excluding Power Sector. Adapted from IPCC (2005) and Al-Salem (2015).

| Process                              | CO <sub>2</sub> concentration in gas stream (vol.%) | Number of sources | Emission (Million tpa) | % of total emission | Average emission per source (MtCO <sub>2</sub> per source) |
|--------------------------------------|-----------------------------------------------------|-------------------|------------------------|---------------------|------------------------------------------------------------|
| Natural gas sweetening               | NA <sup>++</sup>                                    | NA                | 50 <sup>+++</sup>      | 0.37                | NA                                                         |
| Petrochemical industry               |                                                     |                   |                        |                     |                                                            |
| Ethylene                             | 12                                                  | 240               | 258                    | 1.93                | 1.08                                                       |
| Ammonia: Process                     | 100                                                 | 194               | 113                    | 0.84                | 0.58                                                       |
| Ammonia: Fuel Combustion             | 8                                                   | 19                | 5                      | 0.04                | 0.26                                                       |
| Ethylene Oxide (EO)                  | 100                                                 | 17                | 3                      | 0.02                | 0.15                                                       |
| Total of petrochemical sector        | 220                                                 | 470               | 379                    | 2.83                | -                                                          |
| Cement production                    | 20                                                  | 1,175             | 932                    | 6.97                | 0.79                                                       |
| Petroleum refineries                 | 3 to 13                                             | 638               | 798                    | 5.97                | 1.25                                                       |
| Biomass (bioenergy and fermentation) | 3 to 100                                            | 303               | 13,466                 | -                   | 0.2                                                        |

Table S3. Properties of candidate gas streams that can be used as input to a capture process. Adapted from: IEA (2004).

| Source                               | CO <sub>2</sub> concentration (% dry by volume) | Pressure of gas stream (MPa) | CO <sub>2</sub> partial pressure (MPa) |
|--------------------------------------|-------------------------------------------------|------------------------------|----------------------------------------|
| CO <sub>2</sub> from fuel combustion |                                                 |                              |                                        |
| Power station flue gas               |                                                 |                              |                                        |
| Natural gas fired boilers            | 7 - 10                                          | 0.1                          | 0.007 - 0.010                          |
| Gas turbines                         | 3 - 4                                           |                              | 0.003 - 0.004                          |
| Oil fired boilers                    | 11 - 13                                         |                              | 0.011 - 0.013                          |
| Coal fired boilers                   | 12 - 14                                         |                              | 0.012 - 0.014                          |

Table S4. Summary of main carbon capture techniques (CCT). After Al-Salem (2015); Al-Mutairi et al. (2017), Thernesz et al. (2008); Johansson et al. (2012; 2013), Fergusson et al. (2011).

| Technique               | Process Summary                                                                                                                                                                                                                                                                                                                                                                                                                                                                                                                                                           | Unit Operation/Technologies/Examples                                                                                                                                                                                                                                                                                                                                                                                                                |
|-------------------------|---------------------------------------------------------------------------------------------------------------------------------------------------------------------------------------------------------------------------------------------------------------------------------------------------------------------------------------------------------------------------------------------------------------------------------------------------------------------------------------------------------------------------------------------------------------------------|-----------------------------------------------------------------------------------------------------------------------------------------------------------------------------------------------------------------------------------------------------------------------------------------------------------------------------------------------------------------------------------------------------------------------------------------------------|
| Post-combustion capture | <ul style="list-style-type: none"> <li>Noted to be the most mature technique which utilizes capture of CO<sub>2</sub> emitted from combustion of fossil fuels in air.</li> <li>The flue gas of the combustion process is used as the feed to this technique.</li> <li>This technique uses technologies well defined in process industry for gas separation where flue gas is typically washed with physical solvent. The gas is scrubbed up to 90% of its CO<sub>2</sub> content.</li> </ul>                                                                              | <ul style="list-style-type: none"> <li>The use of solvents and sorbents is considered as prime example for extracting carbon rich streams after passing CO<sub>2</sub> rich gas in intimate contact with solvents or sorbents capable of capturing it.</li> <li>Application of polymeric, metallic or ceramic membrane is another common method.</li> <li>A range of solvents exists namely monoethanolamine (MEA), ammonia or seawater.</li> </ul> |
| Pre-combustion capture  | <ul style="list-style-type: none"> <li>The technology relies on decarbonizing the fuel gas before entering the combustion process with a H<sub>2</sub> rich one.</li> <li>Otherwise, a central location might be used to collect and reform the feed gas, where all inlet gas is decarbonized. This method is best used when refinery gas is used for combined heat and power (CHP) generation or for power stations using refinery feedstock (Fergusson et al., 2011). Solvent removal can be achieved by Selexol, methyl-diethanolamine (MDEA) or membranes.</li> </ul> | <ul style="list-style-type: none"> <li>The reaction of fuel and oxygen post syngas production (CO + H<sub>2</sub>) is achieved. Absorption by physical or chemical means is then applied.</li> <li>The CO is then reacted with steam (catalytically) in a shift converter to produce CO<sub>2</sub> (later separated) and H<sub>2</sub>O. A range of coals, petcoke, fuel oils or solid waste can be used as gasifier feedstock.</li> </ul>         |
| Oxy fuel combustion     | <ul style="list-style-type: none"> <li>This technique utilises the concept of combusting fuel (with oxygen) from an air separation unit.</li> <li>Boiler temperature is typically moderated by using a recycled portion of the flue gas back to the combustion chamber in such technologies.</li> <li>The produced CO<sub>2</sub> and/or H<sub>2</sub>O rich gas can be recycled to the combustor to reduce the concentration of oxygen.</li> </ul>                                                                                                                       | This method is suitable for units, where pure O <sub>2</sub> is used instead of air in combustion processes to produce CO <sub>2</sub> and water instead of a mixture of CO <sub>2</sub> , N <sub>2</sub> and water.                                                                                                                                                                                                                                |
| Chemical Looping        | <ul style="list-style-type: none"> <li>Noted to be the least mature technique in CCS with majority of the work in research and pilot stages.</li> <li>The concept relies on the circulation of an oxygen carrier particle (e.g. metal oxide) between an air reactor and a fuel reactor (Markström et al., 2013), where particles are then transported through a loop seal, entering the fuel reactor where CO<sub>2</sub> is fluidized.</li> </ul>                                                                                                                        | <ul style="list-style-type: none"> <li>The name was originally recognised as chemical looping back in 1987 (Ishida and Jin, 1994; Ishida et al., 1987).</li> <li>Typically, active oxides of iron, nickel, copper and manganese are used as carriers. Gaseous fuels are typically used and success was reported for more than 4000 h of operation in 12 units of 0.3-140 kW.</li> </ul>                                                             |

Table S5. Power stations in Kuwait with respect to fuel used and type of turbine. Source: MEW (2014).

| Power Station | Declared Capacity (MW output) | Primary Fuel Used                             | Type of Turbine                     |
|---------------|-------------------------------|-----------------------------------------------|-------------------------------------|
| Shuwaikh      | 252                           | Natural gas                                   | Gas cycle                           |
| Shuaiba North | 876                           | Natural gas and Gas oil                       | Gas cycle                           |
| Shuaiba South | 720                           | Natural gas                                   | Thermal steam turbine               |
| Doha East     | 1158                          | Natural gas and Gas oil/Gas oil and Crude oil | Gas cycle and Thermal steam turbine |
| Doha West     | 2360                          | Natural gas and Heavy oil                     |                                     |
| Al-Zour       | 5306                          | Natural gas and Gas oil/Gas oil and Crude oil |                                     |
| Sabiya        | 4867                          | Natural gas and Gas oil/Gas oil and Crude oil |                                     |

Table S6. Power stations in Kuwait with respect to type of turbine and capacity distribution. Source: MEW (2014).

| Stations <sup>a</sup>         | Current available capacity |                    |                       |       | Total available capacity |
|-------------------------------|----------------------------|--------------------|-----------------------|-------|--------------------------|
|                               | Gas turbine <sup>d</sup>   |                    | Steam turbine         |       |                          |
|                               | Capacity of each unit      | Total <sup>e</sup> | Capacity of each unit | Total |                          |
| Shuwaikh station <sup>b</sup> | 6 x 42                     | 252                | -                     | -     | 252                      |
| Shuaiba South station         | -                          | -                  | 6 x 120               | 720   | 720                      |
| Shuaiba North station         | 3 x 2 20                   | 660                | 1 x 215.5             | 215.5 | 875.5                    |
| Doha East station             | 6 x 18                     | 108                | 7 x 150               | 1050  | 1158                     |
| Doha West station             | 5 x 28.2                   | 141                | 8 x 300               | 2400  | 2541                     |
| Al-Zour South station         | 8 x 130                    | 1040               | 8 x 300               | 2400  | 5305.8                   |
|                               | 4 x 27.7                   | 110.8              | 2 x 280               | 560   |                          |
|                               | 5 x 165                    | 825                | 2 x 185               | 370   |                          |
| Sabiya station <sup>c</sup>   | 6 x 41.7                   | 250.2              | 8 x 300               | 2400  | 4866.7                   |
|                               | 4 x 62.5                   | 250                | 3 x 215.5             | 646.5 |                          |
|                               | 6 x 220                    | 1320               |                       |       |                          |
| Total                         |                            | 4957               |                       | 10762 | 15719                    |

Note to reader: a. Thermal steam turbines are dominant type due to their high efficiency steam cycle. Combine cycle turbines are also hosted including both steam and gas turbines to obtain the desired electrical output. The constructed complementary gas turbines are aimed at overcoming peak loads at summer season; b. One reverse osmosis (RO) unit exists in this station and has been included in the analysis in combination with the electrical generation capacity to reflect the real-life scenario of the plant. All stations include desalination units which represent 93% of fresh water supply (Darwish et al., 2008a; 2008b; Darwish and Al-Najem, 2005; Darwish and Darwish, 2008). c. Sabyia power station operates a steam cycle with an efficiency ranging between 30 to 35% (Al-Salem et al., 2020); d. It can be noted that the main contributor to the emission strength in Kuwait is Al-Zour station (32%) (Figure 1 in Article). As shown the station utilises the four main types of fossil fuels used for the power sector in Kuwait (e.g., natural gas, heavy fuel oil, gas oil and crude oil). The largest consumption in the station is dedicated for heavy fuel oil to feed the gas turbines by the amount of  $1.009 \times 10^6$  tpa. This is closely followed by crude oil consumption for the turbines of the station by the amount of  $824.363 \times 10^3$  tpa. The second largest emitter among all stations is Sabyia station, which also consumes heavy fuel oil as the main fossil fuel for its turbines by the amount of  $1.89 \times 10^6$  mtpa. Each of those stations host eight steam turbines of a 300 MW capacity that uses heavy fuel oil as the main fuel component (Al-Mutairi et al., 2017; Al-Salem et al., 2020); e. Natural gas for the power sector is consumed at the amount of 20.1 bcm and deficit is imported from neighbouring countries (WEC, 2017). Petroleum refineries and their hydrocarbon flaring activities are depicted elsewhere (Al-Salem, 2015).

Table S7. Fuel consumed in Kuwait's power sector during the years 2010-2013 and emission factors (EF) for each type of fuel used.

| Fuel (million ton) (MEW, 2014; Al-Mutairi et al., 2017) | 2010   | 2011  | 2012  | 2013   | EF (kg CO <sub>2</sub> /kg fuel) (Darwish, 2013) |
|---------------------------------------------------------|--------|-------|-------|--------|--------------------------------------------------|
| Gas oil                                                 | 1.0241 | 1.154 | 1.342 | 1.0410 | 0.875                                            |
| Heavy fuel oil                                          | 4.947  | 4.387 | 4.345 | 5.293  | 0.85                                             |
| Natural gas                                             | 5.285  | 6.080 | 6.654 | 6.387  | 0.75                                             |
| Crude oil                                               | 2.0244 | 2.191 | 1.867 | 1.276  | 0.85                                             |

Table S8. Power Station Raw Materials.

| Category                                | Value (\$) |
|-----------------------------------------|------------|
| COAL & SORBENT HANDLING                 | 3,249      |
| COAL & SORBENT PREP & FEED              | 5,517      |
| FEED WATER & MISC. BOP SYSTEMS          | 7,230      |
| GASIFIER & ACCESSORIES                  | 12,187     |
| GAS CLEANUP & PIPING & CO2 COMPRESSION  | 3,037      |
| COMBUSTION TURBINE/ACCESSORIES          | 806        |
| HRSG, DUCTING & STACK                   | 2,436      |
| STEAM TURBINE GENERATOR                 | 1,059      |
| COOLING WATER SYSTEM                    | 8,140      |
| ASH/SPENT SORBENT HANDLING SYS          | 1,623      |
| ACCESSORY ELECTRIC PLANT                | 13,137     |
| INSTRUMENTATION & CONTROL               | 2,069      |
| IMPROVEMENTS TO SITE                    | 2,045      |
| BUILDINGS & STRUCTURES                  | 6,957      |
| Initial Cost for Catalyst and Chemicals | 7,532      |
| Inventory Capital                       | 16,084     |
| Total                                   | 93,108     |

Table S9. Power Station Equipment's.

| Category                               | Value (\$) |
|----------------------------------------|------------|
| COAL & SORBENT HANDLING                | 17,484     |
| COAL & SORBENT PREP & FEED             | 30,185     |
| FEED WATER & MISC. BOP SYSTEMS         | 8,916      |
| GASIFIER & ACCESSORIES                 | 377,533    |
| GAS CLEANUP & PIPING & CO2 COMPRESSION | 111,559    |
| COMBUSTION TURBINE/ACCESSORIES         | 92,027     |
| HRSG, DUCTING & STACK                  | 34,963     |
| STEAM TURBINE GENERATOR                | 70,034     |
| COOLING WATER SYSTEM                   | 8,342      |
| ASH/SPENT SORBENT HANDLING SYS         | 21,401     |
| ACCESSORY ELECTRIC PLANT               | 33,841     |
| INSTRUMENTATION & CONTROL              | 11,248     |
| IMPROVEMENTS TO SITE                   | 3,470      |
| Total Cost                             | 821,003    |

Table S10. Power Station Labour.

| Category | Value (\$) |
|----------|------------|
| Labour   | 323,505    |

Table S11. Power Station Utilities

| Utilities               | Value (\$) |
|-------------------------|------------|
| Water consumption       | 3,240      |
| Electricity Consumption | 350        |
| Total                   | 3,590      |



Table S15. Power Station Total Cost

| Category / Years                      | 1       | 2       | 3       | 4       | 5       | 6       | 7       | 8       | 9       | 10      |
|---------------------------------------|---------|---------|---------|---------|---------|---------|---------|---------|---------|---------|
| Operating Costs                       | 856,256 | 856,256 | 856,256 | 856,256 | 856,256 | 856,256 | 856,256 | 856,256 | 856,256 | 856,256 |
| Factory Costs                         |         |         |         |         |         |         |         |         |         |         |
| O&M                                   | 102,152 | 102,152 | 102,152 | 102,152 | 102,152 | 102,152 | 102,152 | 102,152 | 102,152 | 102,152 |
| TS & M                                | 148,593 | 148,593 | 148,593 | 148,593 | 148,593 | 148,593 | 148,593 | 148,593 | 148,593 | 148,593 |
| Fuel                                  | 593,589 | 593,589 | 593,589 | 593,589 | 593,589 | 593,589 | 593,589 | 593,589 | 593,589 | 593,589 |
| Total Factory Cost (Operational Cost) | 844,335 | 844,335 | 844,335 | 844,335 | 844,335 | 844,335 | 844,335 | 844,335 | 844,335 | 844,335 |
| Non-factory Cost                      |         |         |         |         |         |         |         |         |         |         |
| Eng'g CM H.O.& Fee                    | 3,794   | 3,794   | 3,794   | 3,794   | 3,794   | 3,794   | 3,794   | 3,794   | 3,794   | 3,794   |
| Land                                  | 30      | 30      | 30      | 30      | 30      | 30      | 30      | 30      | 30      | 30      |
| Other Owner's Costs                   | 8,098   | 8,098   | 8,098   | 8,098   | 8,098   | 8,098   | 8,098   | 8,098   | 8,098   | 8,098   |
| Total Non-Factory Cost (Fixed Cost)   | 11,922  | 11,922  | 11,922  | 11,922  | 11,922  | 11,922  | 11,922  | 11,922  | 11,922  | 11,922  |
| Non-Operating Costs (Capital Cost)    |         |         |         |         |         |         |         |         |         |         |
| Financing Costs                       | 1,458   | 1,458   | 1,458   | 1,458   | 1,458   | 1,458   | 1,458   | 1,458   | 1,458   | 1,458   |
| Interest Value Industrial             | 19,693  | 17,723  | 17,594  | 17,464  | 17,334  | 17,204  | 17,074  | 16,945  | 16,815  | 16,685  |
| Interest Commercial                   |         | 22,975  | 20,103  | 19,914  | 19,724  | 19,535  | 19,346  | 19,156  | 18,967  | 18,778  |
| Depreciation and Amortization         | 27,999  | 27,999  | 27,999  | 27,999  | 27,999  | 27,999  | 27,999  | 27,999  | 27,999  | 27,999  |
| Total Non-Operation Costs             | 49,149  | 70,154  | 67,153  | 66,834  | 66,515  | 66,195  | 65,876  | 65,557  | 65,238  | 64,919  |
| Total Production Costs                | 905,405 | 926,410 | 923,409 | 923,090 | 922,771 | 922,452 | 922,133 | 921,814 | 921,495 | 921,175 |

Table S15. (Cont'd) Power Station Total Cost

[illegible]

Table S15. (Cont'd) Power Station Total Cost

| Category / Years                      | 21      | 22      | 23      | 24      | 25      | 26      | 27      | 28      | 29      | 30      |
|---------------------------------------|---------|---------|---------|---------|---------|---------|---------|---------|---------|---------|
| Operating Costs                       | 856,256 | 856,256 | 856,256 | 856,256 | 856,256 | 856,256 | 856,256 | 856,256 | 856,256 | 856,256 |
| Factory Costs                         |         |         |         |         |         |         |         |         |         |         |
| O&M                                   | 102,152 | 102,152 | 102,152 | 102,152 | 102,152 | 102,152 | 102,152 | 102,152 | 102,152 | 102,152 |
| TS & M                                | 148,593 | 148,593 | 148,593 | 148,593 | 148,593 | 148,593 | 148,593 | 148,593 | 148,593 | 148,593 |
| Fuel                                  | 593,589 | 593,589 | 593,589 | 593,589 | 593,589 | 593,589 | 593,589 | 593,589 | 593,589 | 593,589 |
| Total Factory Cost (Operational Cost) | 844,335 | 844,335 | 844,335 | 844,335 | 844,335 | 844,335 | 844,335 | 844,335 | 844,335 | 844,335 |
| Non-factory Cost                      |         |         |         |         |         |         |         |         |         |         |
| Eng'g CM H.O.& Fee                    | 3,794   | 3,794   | 3,794   | 3,794   | 3,794   | 3,794   | 3,794   | 3,794   | 3,794   | 3,794   |
| Land                                  | 30      | 30      | 30      | 30      | 30      | 30      | 30      | 30      | 30      | 30      |
| Other Owner's Costs                   | 8,098   | 8,098   | 8,098   | 8,098   | 8,098   | 8,098   | 8,098   | 8,098   | 8,098   | 8,098   |
| Total Non-Factory Cost (Fixed Cost)   | 11,922  | 11,922  | 11,922  | 11,922  | 11,922  | 11,922  | 11,922  | 11,922  | 11,922  | 11,922  |
| Non-Operating Costs (Capital Cost)    |         |         |         |         |         |         |         |         |         |         |
| Financing Costs                       | 1,458   | 1,458   | 1,458   | 1,458   | 1,458   | 1,458   | 1,458   | 1,458   | 1,458   | 1,458   |
| Interest Value Industrial             | -       | -       | -       | -       | -       | -       | -       | -       | -       | -       |
| Interest Commercial                   | -       | -       | -       | -       | -       | -       | -       | -       | -       | -       |
| Depreciation and Amortization         | 27,999  | 27,999  | 27,999  | 27,999  | 27,999  | 27,999  | 27,999  | 27,999  | 27,999  | 27,999  |
| Total Non-Operation Costs             | 29,456  | 29,456  | 29,456  | 29,456  | 29,456  | 29,456  | 29,456  | 29,456  | 29,456  | 29,456  |
| Total Production Costs                | 885,712 | 885,712 | 885,712 | 885,712 | 885,712 | 885,712 | 885,712 | 885,712 | 885,712 | 885,712 |

Table S16. PS Pre-Production

| Project Management                   | Value (\$) |
|--------------------------------------|------------|
| 6 Months Fixed O&M                   | 15,260     |
| 1 Month Variable O&M                 | 4,088      |
| 25% of 1 Months Fuel Cost at 100% CF | 937        |
| 2% of TPC                            | 32,390     |
| Total                                | 52,676     |



Table S21. Power Station Cash Flow.

| Category                            | Construction Period | 1         | 2         | 3         | 4         | 5         | 6         | 7         | 8         | 9         | 10        |
|-------------------------------------|---------------------|-----------|-----------|-----------|-----------|-----------|-----------|-----------|-----------|-----------|-----------|
| Cash In                             | 1,312,840           | 1,044,014 | 1,044,014 | 1,044,014 | 1,044,014 | 1,044,014 | 1,044,014 | 1,044,014 | 1,044,014 | 1,044,014 | 1,044,014 |
| Sales Revenue                       | -                   | 1,016,015 | 1,016,015 | 1,016,015 | 1,016,015 | 1,016,015 | 1,016,015 | 1,016,015 | 1,016,015 | 1,016,015 | 1,016,015 |
| Investor                            | 328,210             | -         | -         | -         | -         | -         | -         | -         | -         | -         | -         |
| Commercial Bank Loan                | 328,210             | -         | -         | -         | -         | -         | -         | -         | -         | -         | -         |
| Industrial Bank Loan                | 656,420             | -         | -         | -         | -         | -         | -         | -         | -         | -         | -         |
| Depreciation & Amortization         | -                   | 27,999    | 27,999    | 27,999    | 27,999    | 27,999    | 27,999    | 27,999    | 27,999    | 27,999    | 27,999    |
| Cash Out                            | 1,312,840           | 908,770   | 981,170   | 901,524   | 901,204   | 900,885   | 900,566   | 900,247   | 899,928   | 899,609   | 899,290   |
| Initial Investment                  | 1,312,840           | -         | -         | -         | -         | -         | -         | -         | -         | -         | -         |
| Payment of Replacement              | -                   | -         | -         | -         | -         | -         | -         | -         | -         | -         | -         |
| Operating Cost                      | -                   | 856,256   | 856,256   | 856,256   | 856,256   | 856,256   | 856,256   | 856,256   | 856,256   | 856,256   | 856,256   |
| Principal Repayment Commercial Bank | -                   | 32,821    | 2,163     | 2,163     | 2,163     | 2,163     | 2,163     | 2,163     | 2,163     | 2,163     | 2,163     |
| Principal Repayment Industrial Bank | -                   | -         | 82,053    | 5,408     | 5,408     | 5,408     | 5,408     | 5,408     | 5,408     | 5,408     | 5,408     |
| Interest Repayment Commercial Bank  | -                   | 19,693    | 17,723    | 17,594    | 17,464    | 17,334    | 17,204    | 17,074    | 16,945    | 16,815    | 16,685    |
| Interest Repayment Industrial Bank  | -                   | -         | 22,975    | 20,103    | 19,914    | 19,724    | 19,535    | 19,346    | 19,156    | 18,967    | 18,778    |
| Net Cash Flow                       | -1,312,840          | 135,244   | 62,844    | 142,490   | 142,809   | 143,128   | 143,447   | 143,766   | 144,085   | 144,405   | 144,724   |
| Category                            | Construction Period | 11        | 12        | 13        | 14        | 15        | 16        | 17        | 18        | 19        | 20        |
| Cash In                             | 1,312,840           | 1,044,014 | 1,044,014 | 1,044,014 | 1,044,014 | 1,044,014 | 1,044,014 | 1,044,014 | 1,044,014 | 1,044,014 | 1,044,014 |
| Sales Revenue                       | -                   | 1,016,015 | 1,016,015 | 1,016,015 | 1,016,015 | 1,016,015 | 1,016,015 | 1,016,015 | 1,016,015 | 1,016,015 | 1,016,015 |
| Investor                            | 328,210             | -         | -         | -         | -         | -         | -         | -         | -         | -         | -         |
| Commercial Bank Loan                | 328,210             | -         | -         | -         | -         | -         | -         | -         | -         | -         | -         |
| Industrial Bank Loan                | 656,420             | -         | -         | -         | -         | -         | -         | -         | -         | -         | -         |
| Depreciation & Amortization         | -                   | 27,999    | 27,999    | 27,999    | 27,999    | 27,999    | 27,999    | 27,999    | 27,999    | 27,999    | 27,999    |
| Cash Out                            | 1,312,840           | 880,253   | 856,256   | 856,256   | 856,256   | 856,256   | 856,256   | 856,256   | 856,256   | 856,256   | 856,256   |
| Initial Investment                  | 1,312,840           | -         | -         | -         | -         | -         | -         | -         | -         | -         | -         |
| Payment of Replacement              | -                   | -         | -         | -         | -         | -         | -         | -         | -         | -         | -         |
| Operating Cost                      | -                   | 856,256   | 856,256   | 856,256   | 856,256   | 856,256   | 856,256   | 856,256   | 856,256   | 856,256   | 856,256   |
| Principal Repayment Commercial Bank | -                   | -         | -         | -         | -         | -         | -         | -         | -         | -         | -         |
| Principal Repayment Industrial Bank | -                   | 5,408     | -         | -         | -         | -         | -         | -         | -         | -         | -         |
| Interest Repayment Commercial Bank  | -                   | -         | -         | -         | -         | -         | -         | -         | -         | -         | -         |
| Interest Repayment Industrial Bank  | -                   | 18,589    | -         | -         | -         | -         | -         | -         | -         | -         | -         |
| Net Cash Flow                       | -1,312,840          | 163,761   | 187,758   | 187,758   | 187,758   | 187,758   | 187,758   | 187,758   | 187,758   | 187,758   | 187,758   |
| Category                            | Construction Period | 21        | 22        | 23        | 24        | 25        | 26        | 27        | 28        | 29        | 30        |
| Cash In                             | 1,312,840           | 1,044,014 | 1,044,014 | 1,044,014 | 1,044,014 | 1,044,014 | 1,044,014 | 1,044,014 | 1,044,014 | 1,044,014 | 1,044,014 |
| Sales Revenue                       | -                   | 1,016,015 | 1,016,015 | 1,016,015 | 1,016,015 | 1,016,015 | 1,016,015 | 1,016,015 | 1,016,015 | 1,016,015 | 1,016,015 |
| Investor                            | 328,210             | -         | -         | -         | -         | -         | -         | -         | -         | -         | -         |
| Commercial Bank Loan                | 328,210             | -         | -         | -         | -         | -         | -         | -         | -         | -         | -         |
| Industrial Bank Loan                | 656,420             | -         | -         | -         | -         | -         | -         | -         | -         | -         | -         |
| Depreciation & Amortization         | -                   | 27,999    | 27,999    | 27,999    | 27,999    | 27,999    | 27,999    | 27,999    | 27,999    | 27,999    | 27,999    |
| Cash Out                            | 1,312,840           | 856,256   | 856,256   | 856,256   | 856,256   | 856,256   | 856,256   | 856,256   | 856,256   | 856,256   | 856,256   |
| Initial Investment                  | 1,312,840           | -         | -         | -         | -         | -         | -         | -         | -         | -         | -         |
| Payment of Replacement              | -                   | -         | -         | -         | -         | -         | -         | -         | -         | -         | -         |
| Operating Cost                      | -                   | 856,256   | 856,256   | 856,256   | 856,256   | 856,256   | 856,256   | 856,256   | 856,256   | 856,256   | 856,256   |
| Principal Repayment Commercial Bank | -                   | -         | -         | -         | -         | -         | -         | -         | -         | -         | -         |
| Principal Repayment Industrial Bank | -                   | -         | -         | -         | -         | -         | -         | -         | -         | -         | -         |
| Interest Repayment Commercial Bank  | -                   | -         | -         | -         | -         | -         | -         | -         | -         | -         | -         |
| Interest Repayment Industrial Bank  | -                   | -         | -         | -         | -         | -         | -         | -         | -         | -         | -         |
| Net Cash Flow                       | -1,312,840          | 187,758   | 187,758   | 187,758   | 187,758   | 187,758   | 187,758   | 187,758   | 187,758   | 187,758   | 187,758   |

## References

- Al-Mutairi, A., Smallbone, A., Al-Salem, S.M., Roskilly, A.P., 2017. The First Carbon Atlas of the State of Kuwait, *Energy*, 133: 317-326.
- Al-Salem, S., A. Ramadan, M. Al-Mourad, A. Naseeb, B. Dashti, 2020. Measurement of CO<sub>2</sub> Emissions from Power and Desalination Plants in Kuwait and Possibility of Carbon Capture and Storage. KISR Final Report, EC093C, Kuwait.
- Al-Salem, S.M., 2015. Carbon dioxide (CO<sub>2</sub>) emission sources in Kuwait from the downstream industry: Critical analysis with a current and futuristic view. *Energy*, 81: 575-587.
- Darwish A, Darwish M., 2008. Energy and water in Kuwait: A sustainability viewpoint Part II, *Desalination*, 230: 140-152.
- Darwish M, Abdulrahim H, Amer A., 2008a. On better utilization of gas turbines in Kuwait. *Energy* 55: 571-588.
- Darwish M, Al-Awadhi F, Darwish A., 2008b. Energy and water in Kuwait. A sustainability view point Part I. *Desalination*, 225; 341-355.
- Darwish M, Al-Najem N., 2005. The water problem in Kuwait. *Desalination*, 177: 167-177.
- Darwish M., 2013. Towards energy conservation in Qatar. *Open Journal of Energy Efficiency* 2: 176-191.
- Ferguson, S., M. Stockle, B. Stamateris, 2011. Reducing CO<sub>2</sub> carbon capture options applied to the refining industry. Foster Wheeler technologies, Proceedings of ERTC Annual Meeting, Barcelona, 29 November-1 December.
- IEA, 2004. Prospects for CO<sub>2</sub> Capture and Storage. Energy Technology Analysis. International Energy Agency and Organization for Economic Cooperation and Development.
- IPCC, 2005. Intergovernmental Panel on Climate Change Special Report on Carbon Dioxide Capture and Storage. IPCC Special Report on CO<sub>2</sub> Capture and Storage.
- Ishida, M., Jin, H., 1994. A novel combustor based on chemical-looping combustion reactions and its reactions kinetics. *Journal of Chemical Engineering of Japan* 27(3): 296–301.
- Ishida, M., Zheng, D., Akehata, T., 1987. Evaluation of a chemical-looping-combustion power-generation system by graphic exergy analysis. *Energy* 12(2): 147–154.
- Johansson, D., J. Sjöblom, T. Bernstsson, 2012. Heat supply alternatives for CO<sub>2</sub> capture in the process industry. *International Journal of Greenhouse Gas Control* 8: 217–232.
- Johansson, D., P. Franck, T. Bernstsson, 2013. CO<sub>2</sub> capture in oil refineries: assessment of the capture avoidance costs associated with different heat supply options in a future energy market. *Energy Conversion and Management*, 66: 127–142.

Johansson, D.; J. Rootzen; T. Bernstsson; F. Johnsson, 2012. Assessment of strategies for CO<sub>2</sub> abatement in the European petroleum refining industry. *Energy* 42: 375–386.

Johansson, D.; P. Franck; K. Pettersson; T. Bernstsson, 2013. Comparative study of Fischer–Tropsch production and post-combustion CO<sub>2</sub> capture at an oil refinery: economic evaluation and greenhouse gas emissions (GHG) balances. *Energy* 59: 387-401.

Markström, P., C. Linderholm, A. Lyngfelt, 2013. Chemical-looping combustion of solid fuels - Design and operation of a 100 kW unit with bituminous coal. *International Journal of Greenhouse Gas Control* 15: 150–162.

MEW, 2014. Statistical Yearbook of Electricity Energy. Statistics Department and Information Center, Ministry of Electricity and Water, MEW, State of Kuwait.

NETL, 2010. National Energy Technology Laboratory (NETL), Cost and Performance for Low-Rank Pulverized Coal Oxy-combustion Energy Plants September, US Department of Energy.

NETL, 2011. National Energy Technology Laboratory (NETL), Cost and Performance Baseline for Fossil Energy Plants Volume 3 Executive Summary: Low Rank Coal and Natural Gas to Electricity, US Department of Energy.

NETL, 2015. National Energy Technology Laboratory (NETL), Cost and Performance Baseline for Fossil Energy Plants Volume 1b: Bituminous Coal (IGCC) to Electricity, U.S Department of Energy, Revision 2b, July 2015.

Thernesz, A.; G. Szalmas; P. Dinka; and T. Simon. 2008. CO<sub>2</sub> Capture-new challenge in refinery industry. *MOL Scientific Magazine (Challenge)*, 3: 12–24.

World Energy Council (WEC), 2017. Energy resources data (Kuwait), <https://www.worldenergy.org/data/resources/country/kuwait/gas/>.

## Variation in Assessment Methodology and Sensitivity Analysis

it is critical to clearly define the sources that will be included from the onset. For Power and Desalination Plants, the typical thermal units are the main CO<sub>2</sub> emission sources, in addition to the gas turbine units (GTU) that were installed over the last decade to boost the MEW production capacity. MEW P&D plants have long-term logs of the fuel types, their chemical compositions including the calorific values, and their consumption rates. This information will be obtained from the plant operators to calculate CO<sub>2</sub> emissions. The current available power generation capacity from the facilities which below to MEW are listed previously in [Table S6](#). The analysis shown in this section compliments the work shown in the previous one. The latest version of the IPCC inventory software (i.e., V2.54) was utilized. In essence IPCC Inventory Software uses the following generic equation to calculate the emissions:

$$\text{Emissions} = \text{Activity Rate} \times \text{Emission Factor} \quad (1)$$

The software is built around a basic data model that relies on predetermined emission factors for different activities which have been categorized depending on the industries, e.g. energy, waste, agriculture and forestry, etc, they belong to. The software supports other database-related features like data reporting and data import/export.

In addition to using IPCC to calculate the CO<sub>2</sub> emissions, the latest US-EPA AP-42 emission factors were used. The AP-42 emission factors have been developed from the source test data, engineering approximations and material balance studies. The AP-42 contains process information and emission factors of more 200 emission sources, and accordingly it covers all the sources of MEW. Finally, in addition to the above two methods, the stoichiometric equations along with the fuel composition were used as a third method to calculate the CO<sub>2</sub> emissions from the MEW power generation facilities. The estimation of the carbon load was conducted in a systematic approach thus: Step 1) For the three methods, the process started by calculating the required thermal energy for each unit of those listed in [Table S6](#), assuming each unit was operating at full production capacity over the whole year. Step 2) Then based on the fuel types that can be used by each unit and assuming entire reliance on this fuel; the amount of fuel that needs to be consumed by the unit was calculated. The calculations in this step relied on the net calorific value for each fuel type. Step 3A) Then based on the fuel consumption rates, the fuel chemical composition and stoichiometric equations, the amount of CO<sub>2</sub> emissions were calculated. Step 3B) Using the suitable US-EPA emission factor, the amount of CO<sub>2</sub> emissions was calculated. In addition to the US-EPA emission factor, more emission factors were used in this step and this included: 1) Ecometrica (Kuwait specific), 2) US-EPA Electricity Emission Factor (US AVG), and 3) IEA-Electricity Emission Factors 1999-2002 (Kuwait specific). Accordingly, this step led to four CO<sub>2</sub> emission values. Step 3C) The third calculation method was that of the IPCC. Step 4) Then based on the practical fuel combinations, e.g. NG for GTUs and HFO for the thermal units compared to GO for GTUs and HFO for the thermal units), the CO<sub>2</sub> emissions obtained in steps 3A, 3B and 3C were added leading to the total CO<sub>2</sub> emissions from each power station. Based on the above, six CO<sub>2</sub> emission values were obtained for each scenario. These values represent: Stoichiometric equations; US-

EPA emissions factors, Ecometrica emissions factors (Kuwait specific), US-averaged electricity emission factors, IEA emissions factors (Kuwait specific), and; IPCC emissions factors. [Figure S1](#) shows the results obtained for Subya Power Station. Four scenarios were considered for this station:

- the GTUs rely entirely on gas oil (GO) while the thermal units rely entirely on heavy fuel oil (HFO),
- the GTUs rely entirely on natural gas (NG) while the thermal units rely entirely on HFO,
- the GTUs rely entirely on GO while the thermal units rely entirely on fuel oil (FO), and;
- the GTUs rely entirely on NG while the thermal units rely entirely on FO.

The calculated annual CO<sub>2</sub> emissions ranged between 24.4 x 10<sup>6</sup> tons for scenario 2 to 28.6 x 10<sup>6</sup> tons for scenario 3 for the stoichiometric equations calculations. As for the results obtained using the US-EPA emission factors, the annual CO<sub>2</sub> emissions ranged between 21.9 x 10<sup>6</sup> tons for scenario 2 to 27.9 x 10<sup>6</sup> tons for scenario 3. For the Ecometrica (Kuwait specific), US-Average electricity emission factors, and the IEA Electricity emission factors (Kuwait specific), the annual CO<sub>2</sub> emissions were 27.2 x 10<sup>6</sup>, 23.8 x 10<sup>6</sup> and 33.7 x 10<sup>6</sup> tons, respectively, with no difference in the results of different scenarios. Finally, the IPCC calculations resulted in annual CO<sub>2</sub> emissions ranging between 23.8 x 10<sup>6</sup> tons for Scenario 2 to 28.9 x 10<sup>6</sup> tons for scenario 3 ([Figure S1](#)). Using the IPCC results as a baseline, [Figure S2](#) shows the stoichiometric equations results had the smallest percentage error (i.e., average error = 0.73%) while those obtained using the US-EPA emission factors, the Ecometrica (Kuwait specific), the US-Average electricity emission factors, and the IEA Electricity emission factors (Kuwait specific) had average percentage errors of 5.33, 4.12, 8.68, and 29.06%, respectively. [Figure S3](#) shows the IPCC's results obtained for the above-listed four scenarios in addition to a fifth scenario reflecting the actual fuel consumed in 2016 as obtained by MEW. Obviously, a quick comparison between the emission values obtained for the five scenarios confirms the fact the units were not fully utilized throughout the year. The reader's attention is brought to the fact the vertical axis in [Figure S3](#) is logarithmic in style, a choice made to allow the relatively negligible CH<sub>4</sub> and N<sub>2</sub>O annual emissions to become visible on the chart. [Figure S4](#) shows the results obtained for Shuaiba North Power Station (SNPS) and Shuaiba South Power Station (SSPS). Two scenarios were considered for each station:

- 1) the GTUs rely entirely on GO, and
- 2) the GTUs rely entirely on NG.

The results obtained using the stoichiometric equations calculations, the US-EPA emission factors method, and the IPCC method illustrate the fact that the CO<sub>2</sub> emissions resulting from the GO were higher than those obtained when burning NG. On the other hand, the results obtained from the six methods show the CO<sub>2</sub> emissions from SNPS were higher than those of SSPS. For the stoichiometric equations method; the annual CO<sub>2</sub> emissions ranged between 3.7 x 10<sup>6</sup> tons for scenario 2 to 5.0 x 10<sup>6</sup> tons for scenario 1 for SNPS. For SSPS, the corresponding values were 3.0 x 10<sup>6</sup> for scenario 2 and 4.1 x 10<sup>6</sup> for scenario 1. As for the results obtained using the US-EPA emission factors, the annual CO<sub>2</sub> emissions ranged between 3.1 x 10<sup>6</sup> tons for SNPS and 2.5 x 10<sup>6</sup> tons for SSPS for scenario 2, while for scenario 1 these values were 4.5 x 10<sup>6</sup> tons for SNPS and 3.7 x 10<sup>6</sup> tons for SSPS. For

the Ecometrica (Kuwait specific), US-Average electricity emission factors, and the IEA Electricity emission factors (Kuwait specific), the annual CO<sub>2</sub> emissions for SNPS were 4.9 x 10<sup>6</sup>, 4.3 x 10<sup>6</sup> and 6.1 x 10<sup>6</sup> tons, respectively, while for SSPS, they were 4.0 x 10<sup>6</sup>, 3.5 x 10<sup>6</sup> and 5.0 x 10<sup>6</sup> tons, respectively. Finally, the IPCC calculations resulted in annual CO<sub>2</sub> emissions ranging between 3.3 x 10<sup>6</sup> tons for Scenario 2 to 5.1 x 10<sup>6</sup> tons for scenario 1 for SNPS and 2.7 x 10<sup>6</sup> tons for Scenario 2 to 4.2 x 10<sup>6</sup> tons for scenario 1 for SSPS, refer to [Figure S4](#). Using the IPCC results as a base, [Figure S5](#) shows the stoichiometric equations results had the smallest percentage error (i.e., average error = 5.00%) while those obtained using the US-EPA emission factors, the Ecometrica (Kuwait specific), the US-Average electricity emission factors, and the IEA Electricity emission factors (Kuwait specific) had average percentage errors of 8.62, 22.11, 7.10, and 51.36%, respectively.

[Figure S6](#) shows the IPCC's results obtained for the above-listed two scenarios in addition to a third one reflecting the actual fuel consumed in 2016 as obtained by MEW. Obviously, a quick comparison between the emission values obtained for the three scenarios confirms the fact the units were not fully utilized throughout the year. The reader's attention is brought to the fact the vertical axis in [Figure S6](#) is logarithmic in style, a choice made to allow the relatively negligible CH<sub>4</sub> and N<sub>2</sub>O annual emissions to become visible on the chart. [Figure S7](#) shows the results obtained for Zour South Power Station (ZSPS). Four scenarios were considered for this station:

- 1) the GTUs rely entirely on GO while the thermal units rely entirely on HFO,
- 2) the GTUs rely entirely on NG while the thermal units rely entirely on HFO,
- 3) the GTUs rely entirely on GO while the thermal units rely entirely on FO, and
- 4) the GTUs rely entirely on NG while the thermal units rely entirely on FO.

The calculated annual CO<sub>2</sub> emissions ranged between 26.2 x 10<sup>6</sup> tons for scenario 2 to 31.1 x 10<sup>6</sup> tons for scenario 3 for the stoichiometric equations calculation method. As for the results obtained using the US-EPA emission factors, the annual CO<sub>2</sub> emissions ranged between 23.5E06 tons for scenario 2 and 30.2 x 10<sup>6</sup> tons for scenario 3. For the calculation methods relying on Ecometrica (Kuwait specific) emission factors, US-Average electricity emission factors, and the IEA Electricity emission factors (Kuwait specific), the annual CO<sub>2</sub> emissions were 29.6 x 10<sup>6</sup>, 26.0 x 10<sup>6</sup> and 36.7 x 10<sup>6</sup> tons, respectively, with no difference in the results of different scenarios. Finally, the IPCC calculations resulted in annual CO<sub>2</sub> emissions ranging between 25.4 x 10<sup>6</sup> tons for Scenario 2 and 31.4 x 10<sup>6</sup> tons for scenario 3, refer to [Figure S7](#). Using the IPCC results as a base, [Figure S8](#) shows the results obtained using the stoichiometric equations calculation method had the smallest percentage error (i.e., average error = 1.01%) while those obtained using the emission factors of US-EPA, the Ecometrica (Kuwait specific), the US-Average electricity sectors, and the IEA (Kuwait specific) had average percentage errors of 5.57, 5.30, 7.64, and 30.53%, respectively.

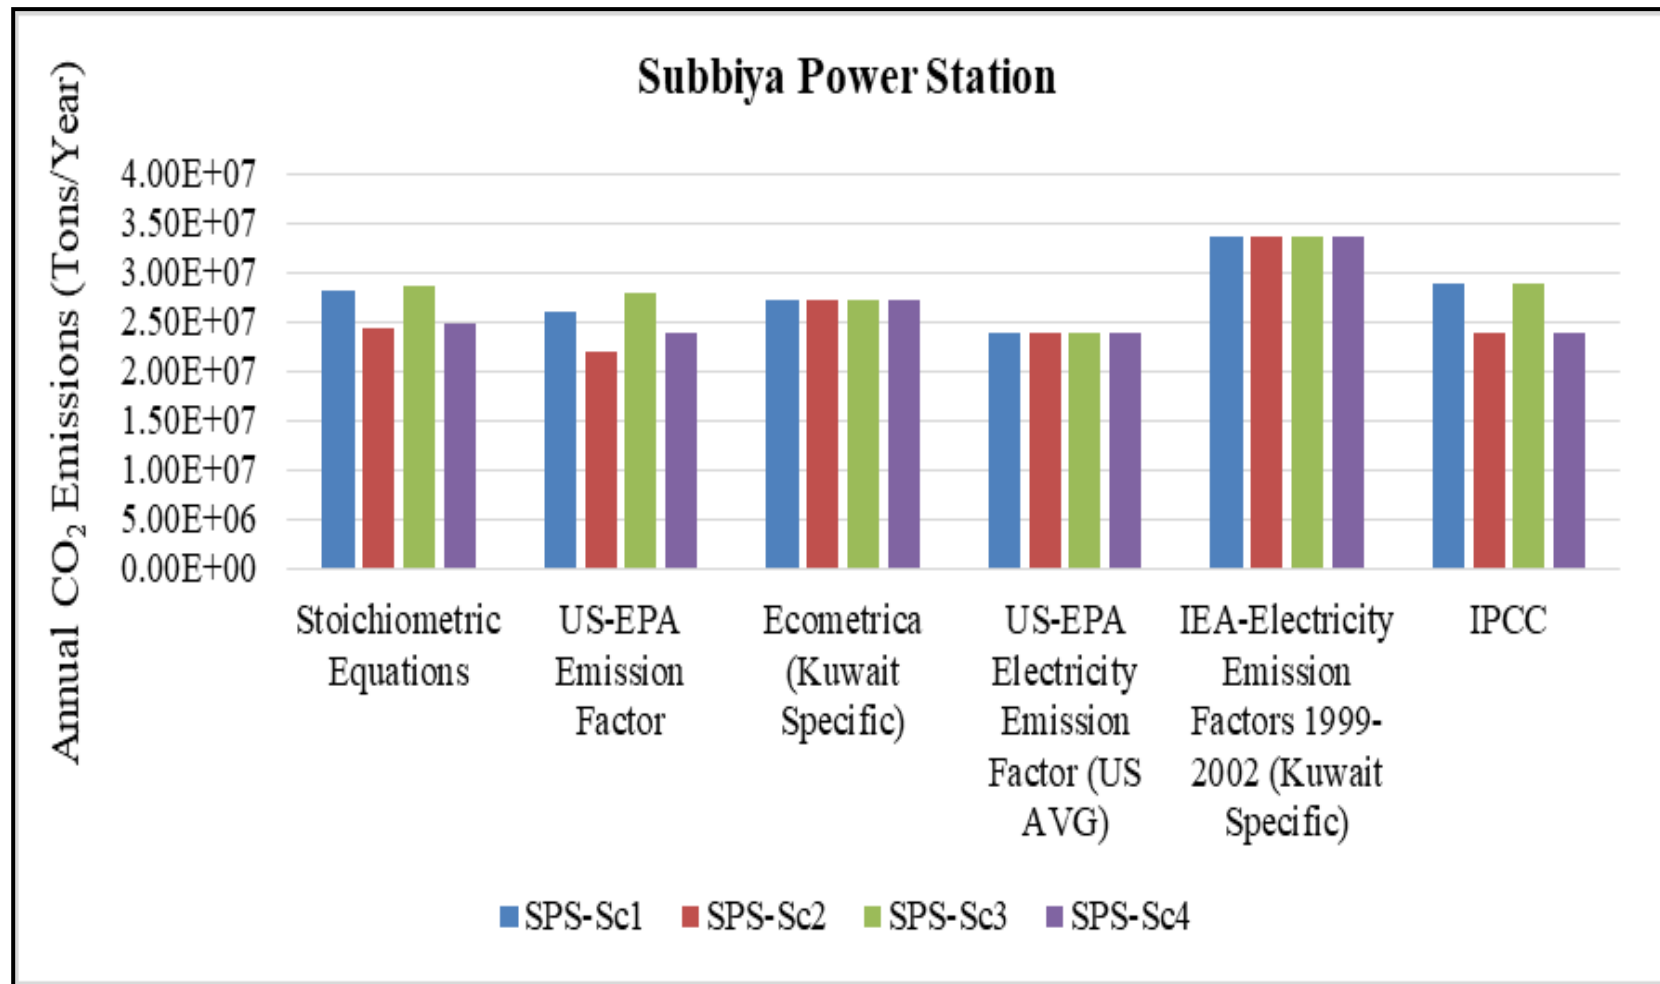

**Figure S1. The annual CO<sub>2</sub> emissions for Subbiya Power Station based on the available possible scenarios using different calculation methods.** Notes: US-EPA: United States Environment Protection Agency, IEA: International Energy Agency, IPCC: Intergovernmental Panel on Climate Change, SPS: Subbiya Power Station, Sc1: Scenario 1: GO + HFO, Sc2: Scenario 2: NG + HFO, Sc3: Scenario 3: GO + FO, Sc4: Scenario 4: NG + FO.

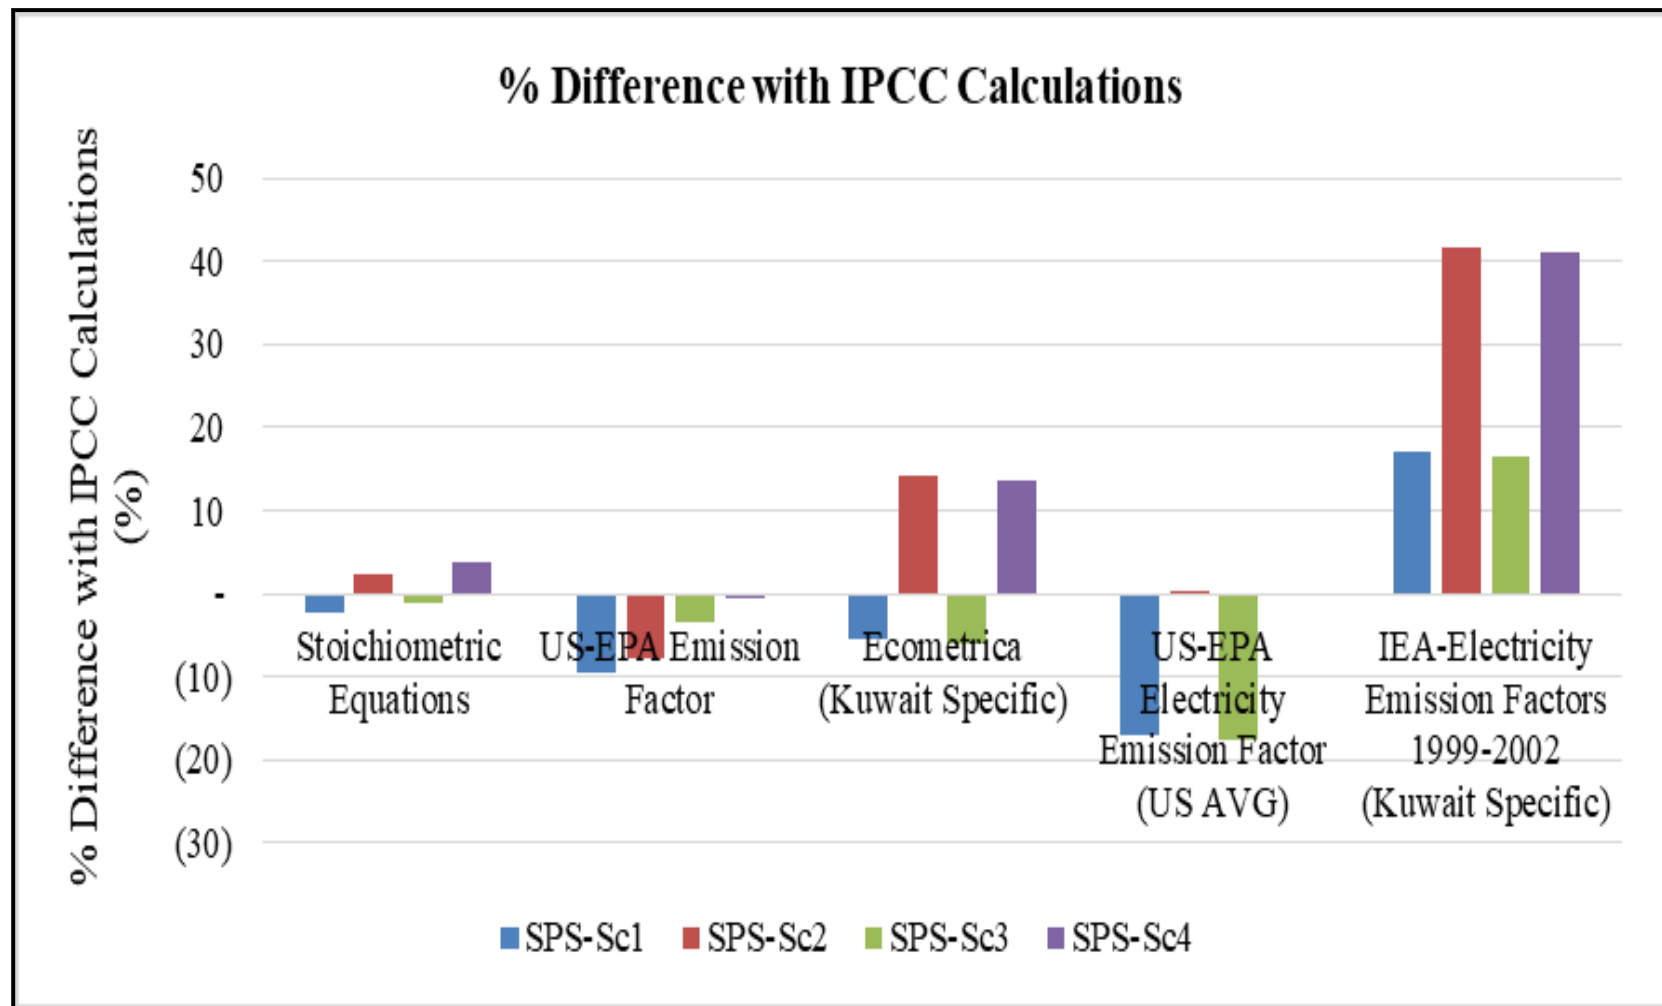

Figure S2. The percentage difference between the calculated annual CO<sub>2</sub> emissions for Sabyia Power Station using different calculation methods and that of IPCC.

Notes: US-EPA: United States Environment Protection Agency, IEA: International Energy Agency, IPCC: Intergovernmental Panel on Climate Change, SPS: Subbiya Power Station, Sc1: Scenario 1: GO + HFO, Sc2: Scenario 2: NG + HFO, Sc3: Scenario 3: GO + FO, Sc4: Scenario 4: NG + FO.

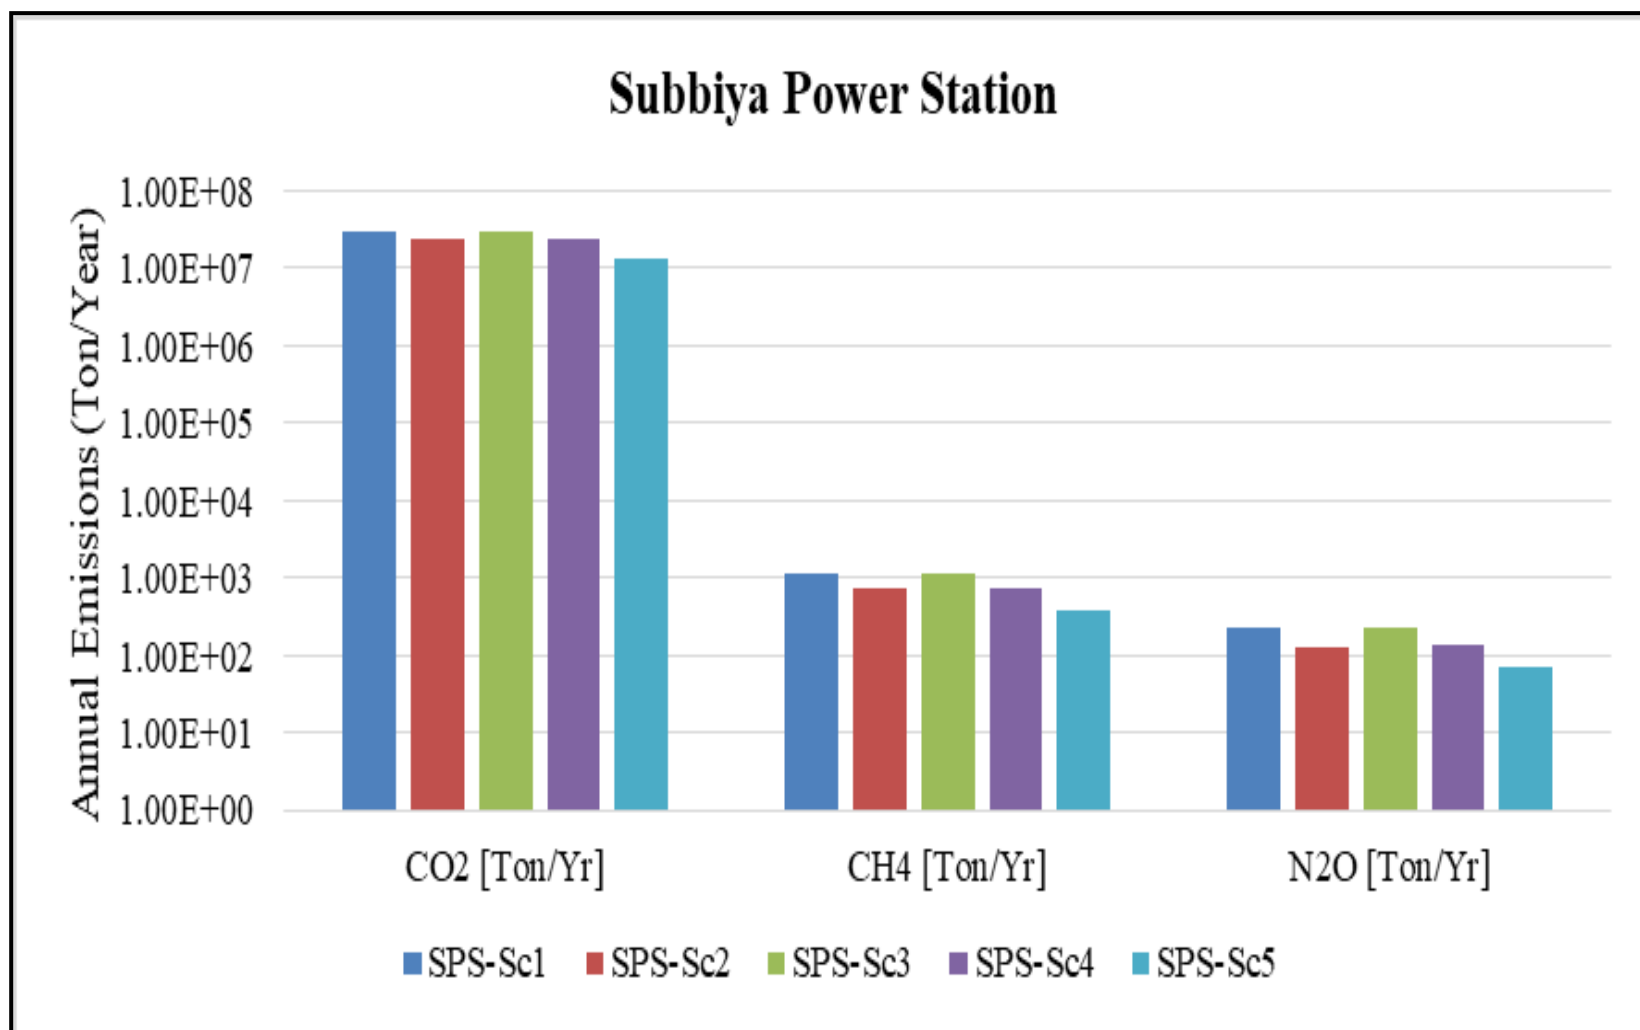

Figure S3. The annual CO<sub>2</sub>, CH<sub>4</sub>, and N<sub>2</sub>O emissions for Subbiya Power Station based on the available possible scenarios using different calculation methods.

Notes: SPS: Subbiya Power Station, Sc1: Scenario 1: GO + HFO, Sc2: Scenario 2: NG + HFO, Sc3: Scenario 3: GO + FO, Sc4: Scenario 4: NG + FO, Sc5: Scenario 5: Actual Fuel Consumption.

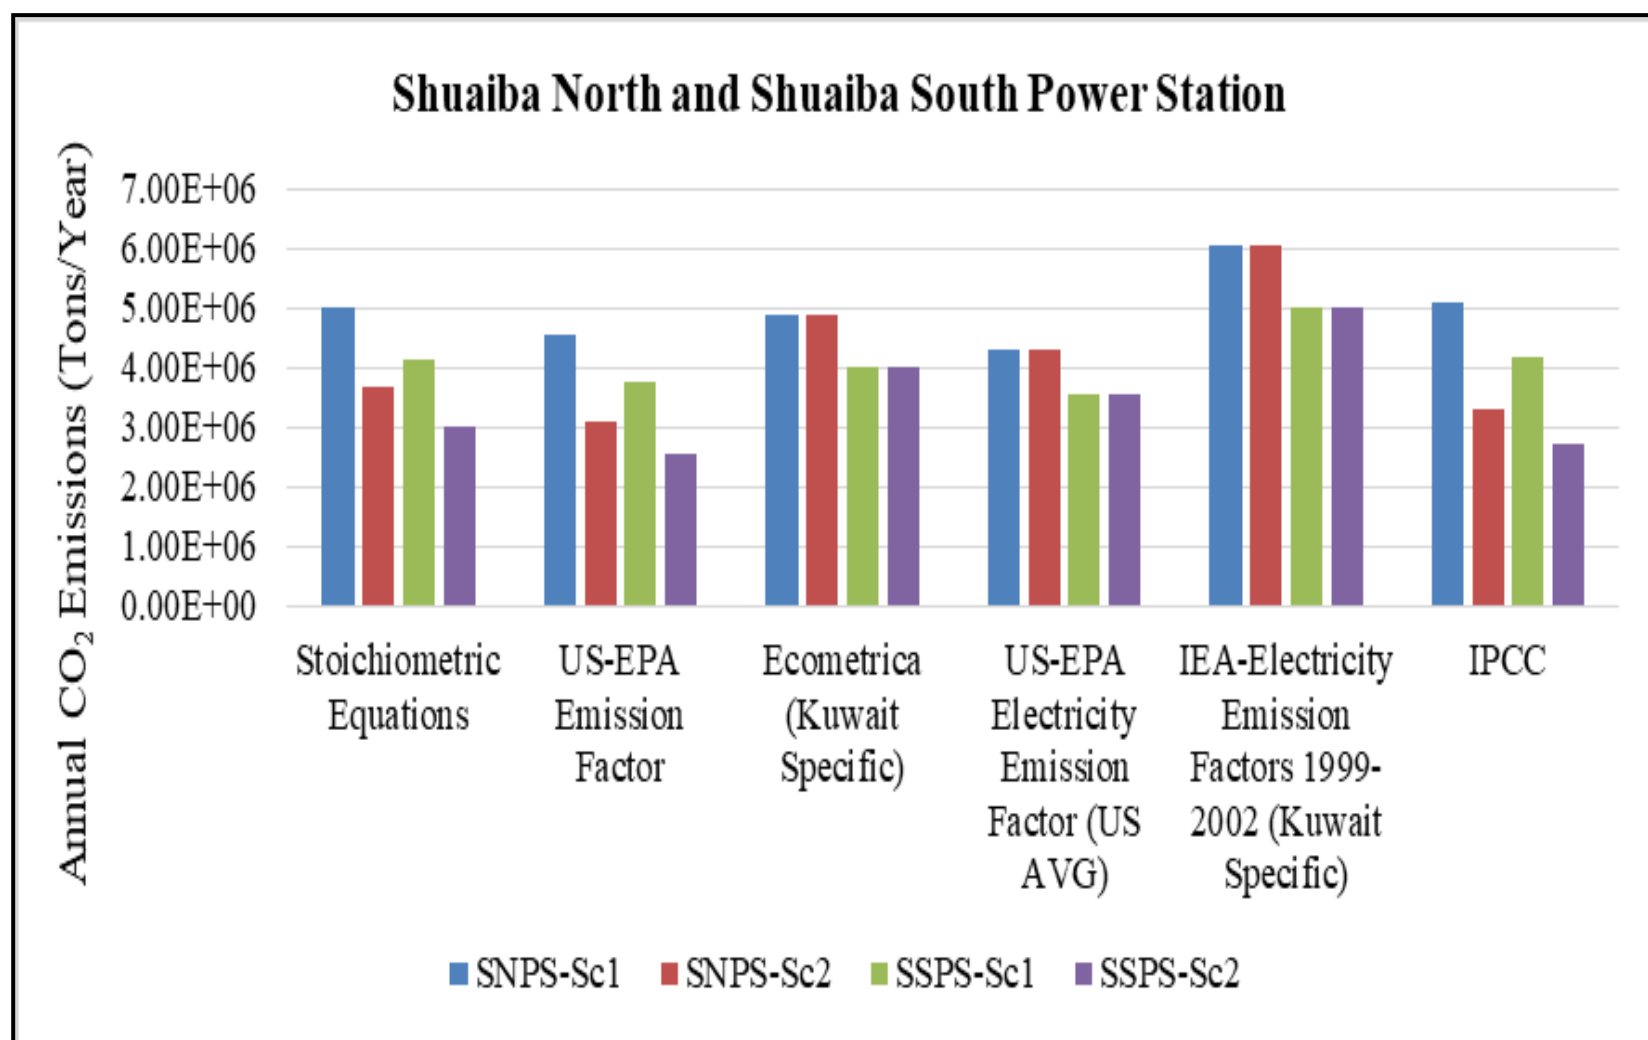

Figure S4. The annual CO<sub>2</sub> emissions for Shuaiba North and Shuaiba South Power Station based on the available possible scenarios using different calculation methods.

Notes: US-EPA: United States Environment Protection Agency, IEA: International Energy Agency, IPCC: Intergovernmental Panel on Climate Change, SNPS: Shuaiba North Power Station, SSPS: Shuaiba South Power Station, Sc1: Scenario 1: GO, Sc2: Scenario 2: NG.

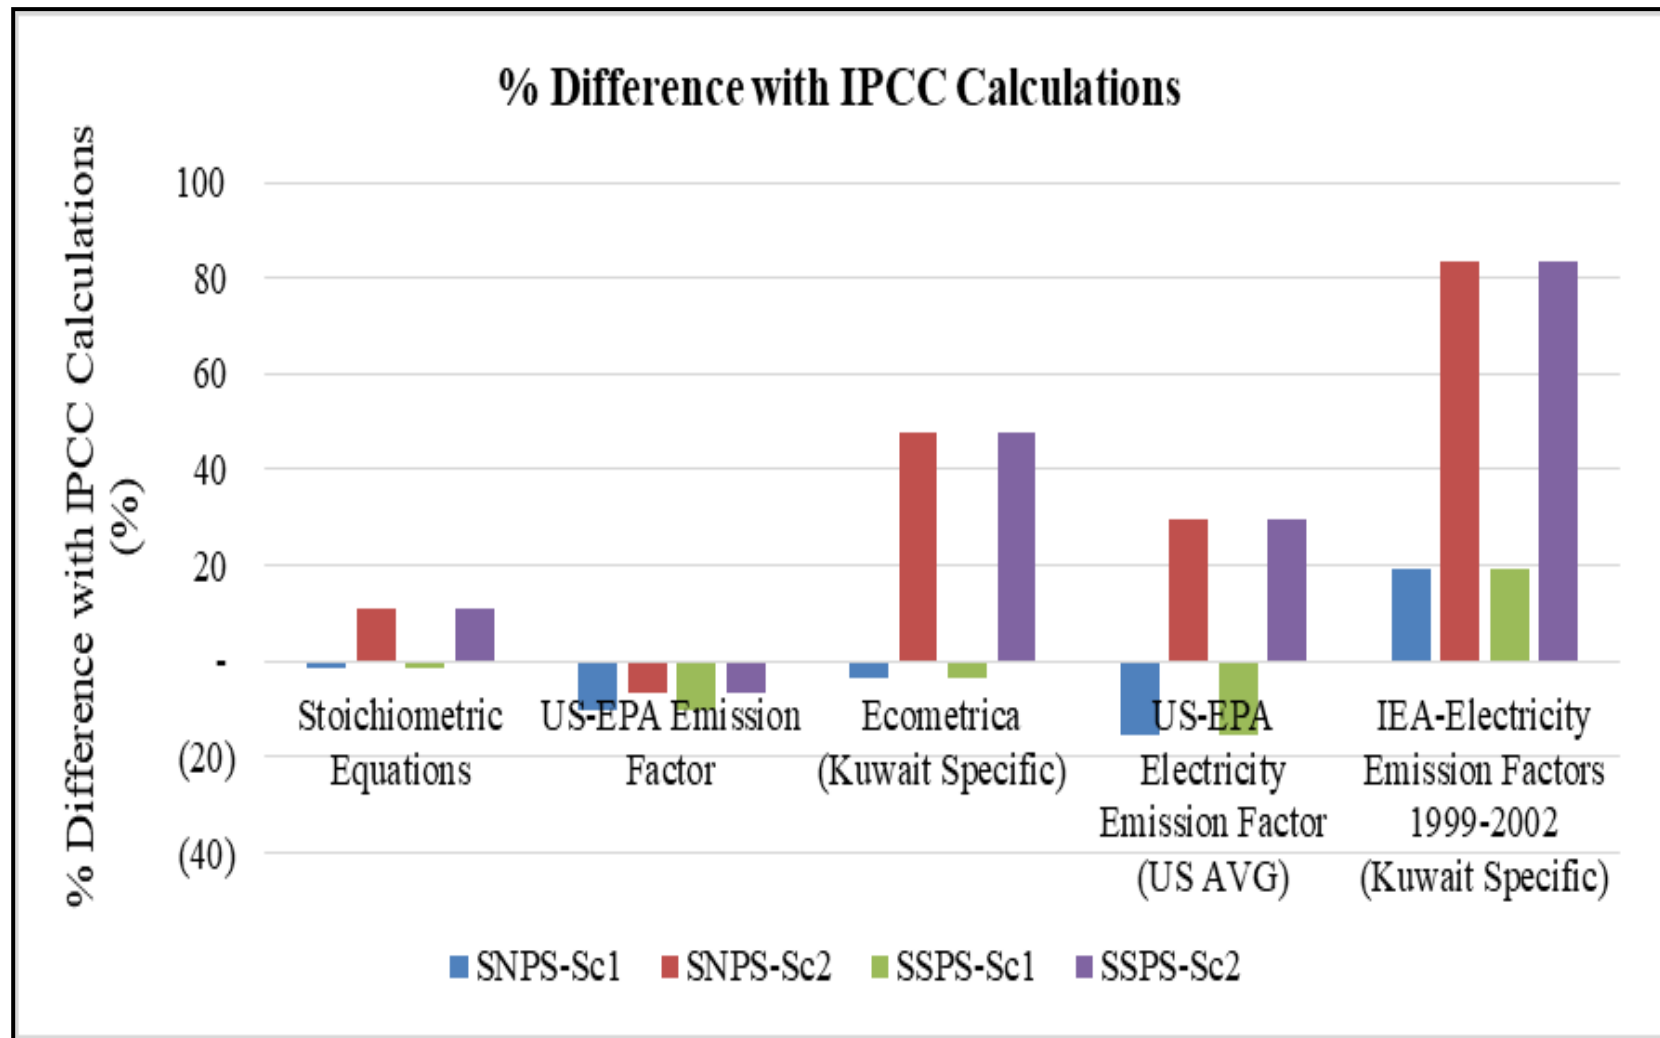

Figure S5. The percentage difference between the calculated annual CO<sub>2</sub> emissions for Shuaiba North and Shuaiba South Power Station using different calculation methods and that of IPCC.

Notes: US-EPA: United States Environment Protection Agency, IEA: International Energy Agency, IPCC: Intergovernmental Panel on Climate Change, SNPS: Shuaiba North Power Station, SSPS: Shuaiba South Power Station, Sc1: Scenario 1: GO, Sc2: Scenario 2: NG.

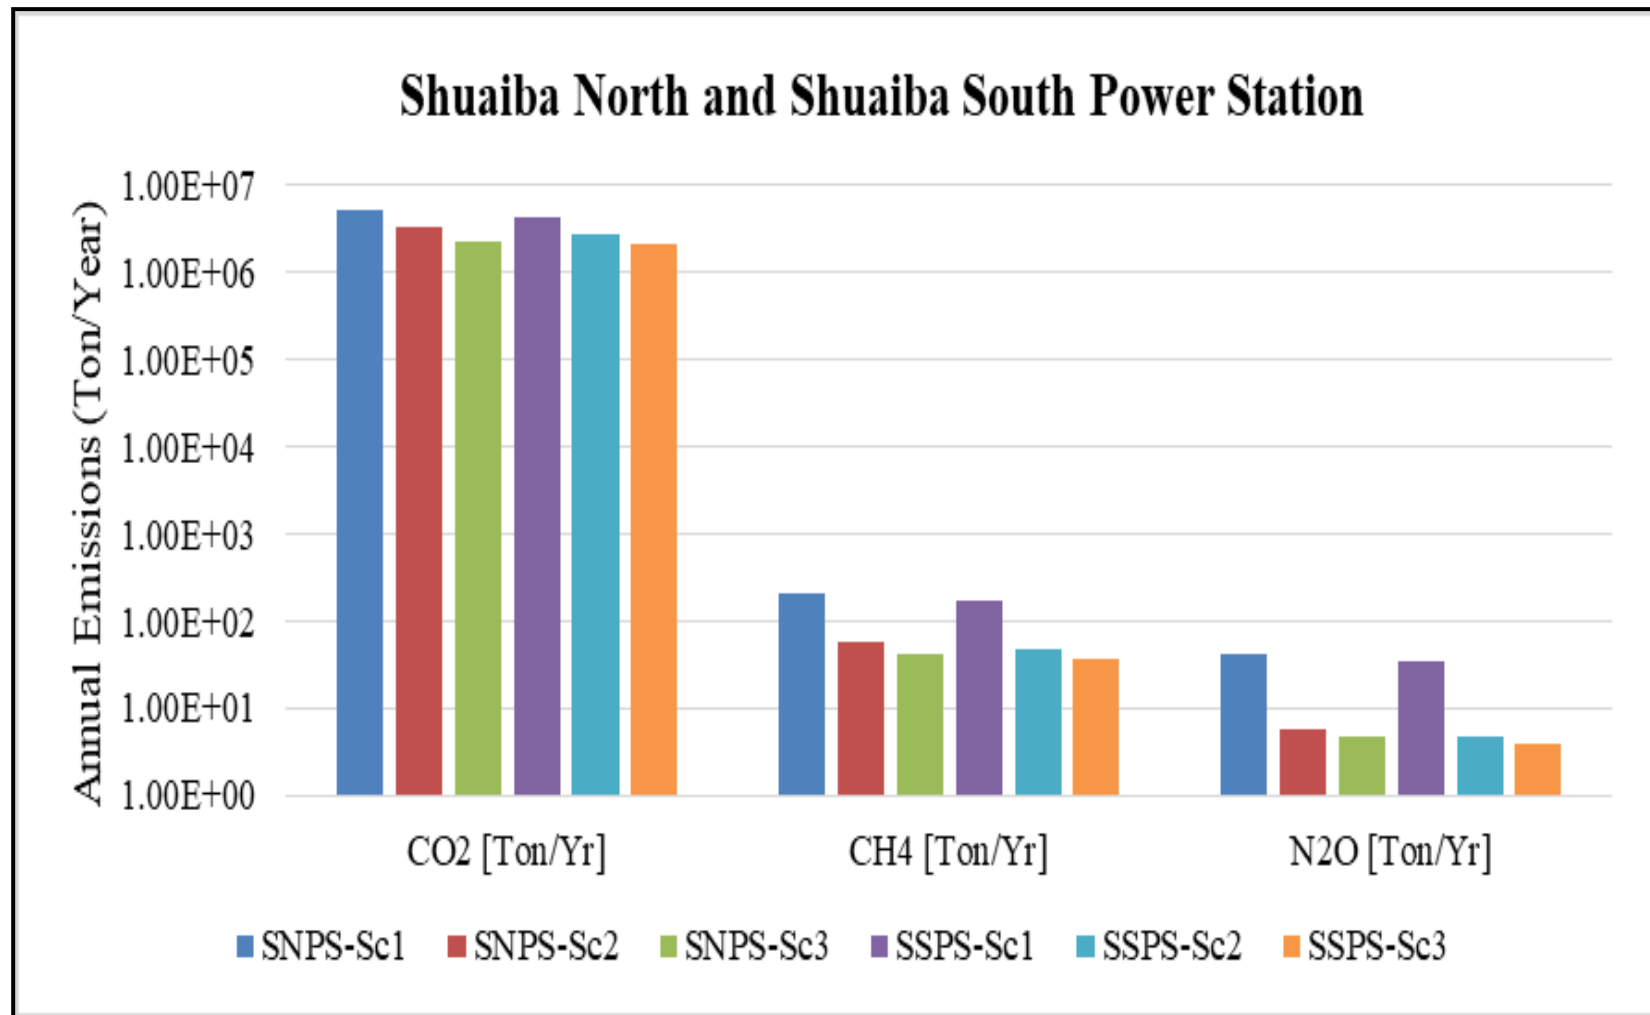

Figure S6. The annual CO<sub>2</sub>, CH<sub>4</sub>, and N<sub>2</sub>O emissions for Shuaiba North and Shuaiba Power Station based on the available possible scenarios using different calculation methods.

Notes: SNPS: Shuaiba North Power Station, SSPS: Shuaiba South Power Station, Sc1: Scenario 1: GO, Sc2: Scenario 2: NG, Sc3: Scenario 3: Actual Fuel Consumption.

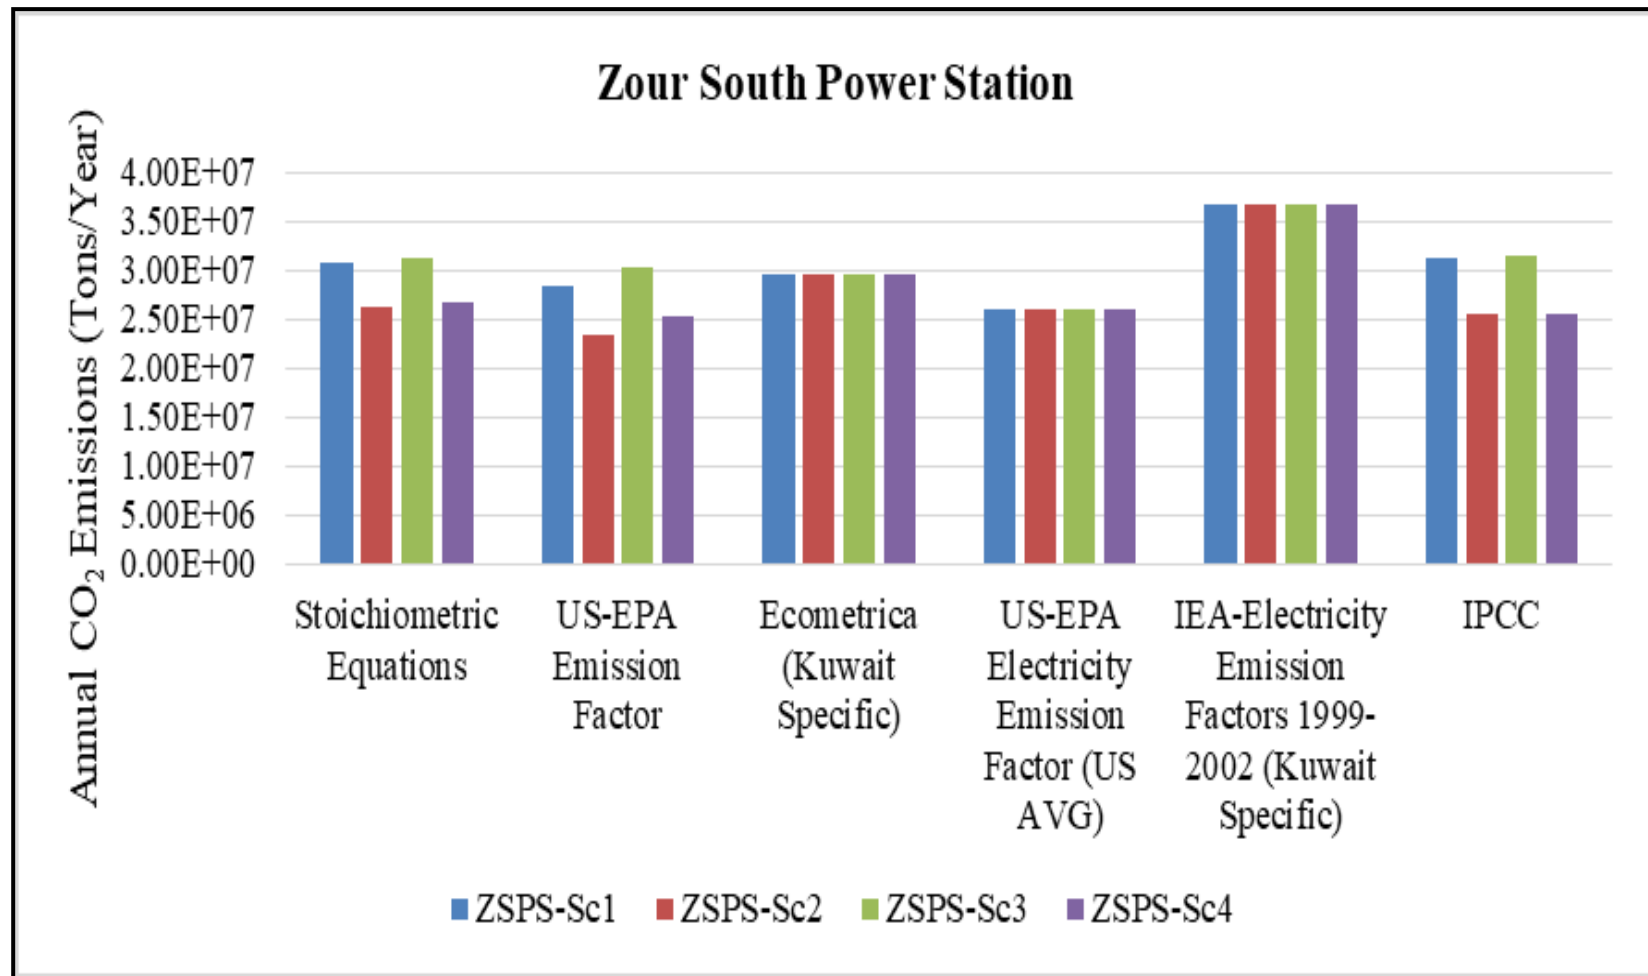

Figure S7. The annual CO<sub>2</sub> emissions for Zour South Power Station based on the available possible scenarios using different calculation methods.

Notes: US-EPA: United States Environment Protection Agency, IEA: International Energy Agency, IPCC: Intergovernmental Panel on Climate Change, ZSPS: Zour South Power Station, Sc1: Scenario 1: GO + HFO, Sc2: Scenario 2: NG + HFO, Sc3: Scenario 3: GO + FO, Sc4: Scenario 4: NG + FO.

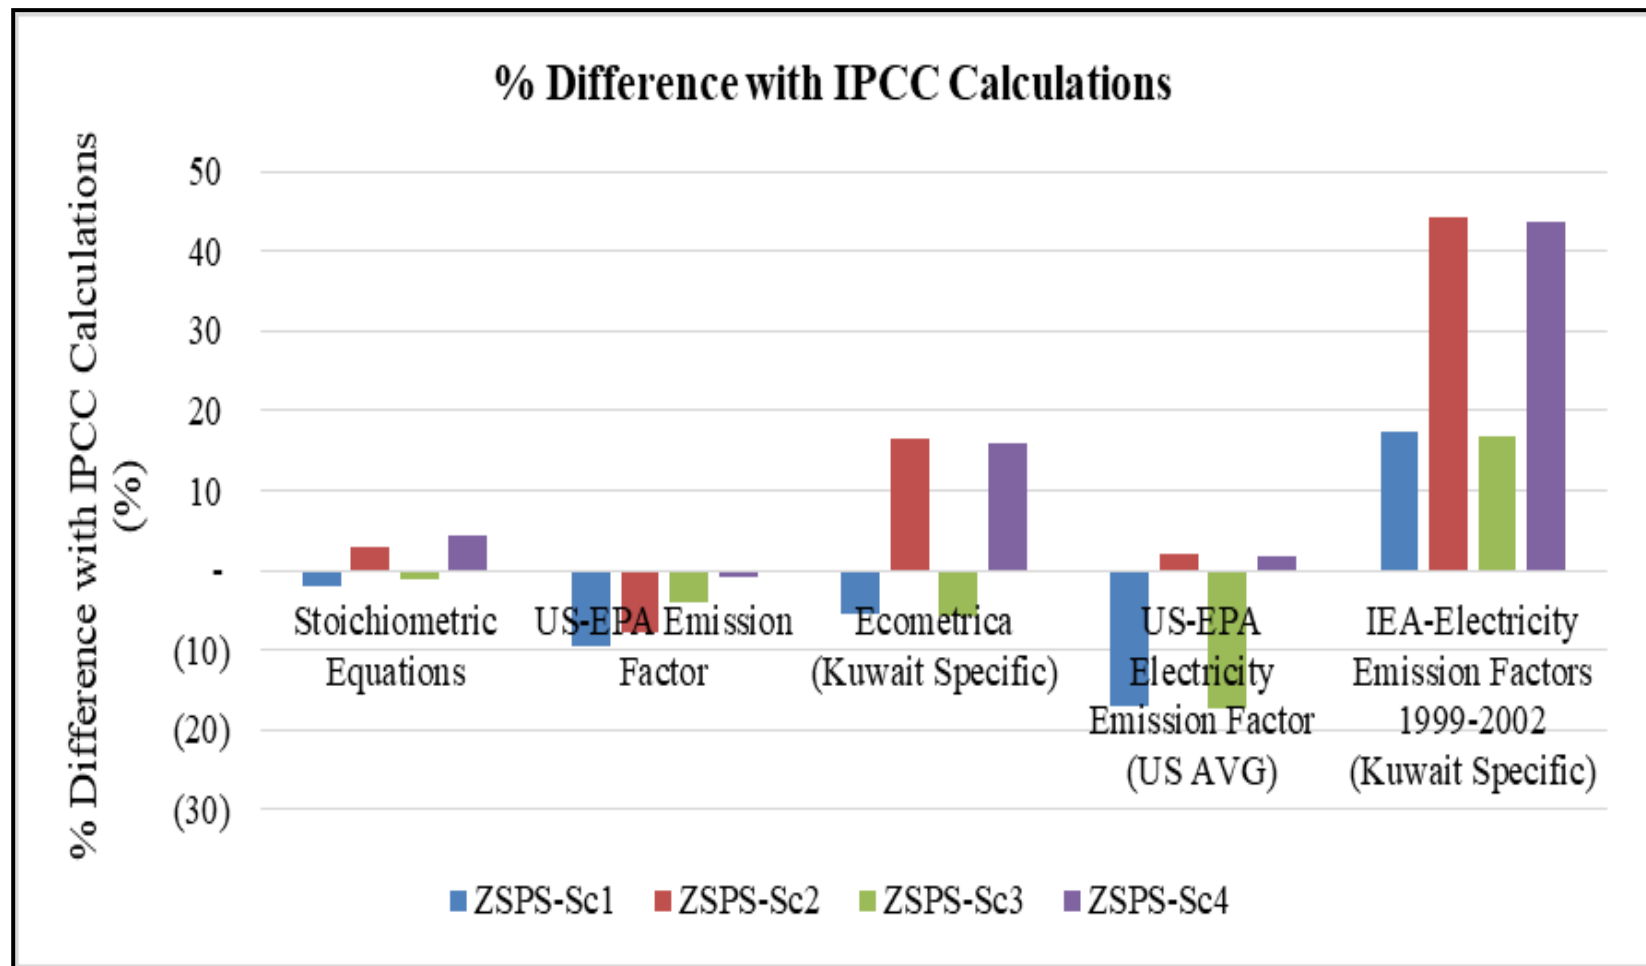

Figure S8. The percentage difference between the calculated annual CO<sub>2</sub> emissions for Zour South Power Station using different calculation methods and that of IPCC.

Notes: US-EPA: United States Environment Protection Agency, IEA: International Energy Agency, IPCC: Intergovernmental Panel on Climate Change, ZSPS: Zour South Power Station, Sc1: Scenario 1: GO + HFO, Sc2: Scenario 2: NG + HFO, Sc3: Scenario 3: GO + FO, Sc4: Scenario 4: NG + FO.

Figure S9 shows the IPCC's results obtained for the above-listed four scenarios in addition to a fifth scenario reflecting the actual fuel consumed in 2016 as obtained by MEW. Obviously, a quick comparison between the emission values obtained for the five scenarios shows the emission rates for the 5<sup>th</sup> scenario as lowest confirming by which the fact the ZSPS units were not fully utilized throughout the year. The reader's attention is brought to the fact the vertical axis in Figure S9 is logarithmic in style, a choice made to allow the relatively negligible CH<sub>4</sub> and N<sub>2</sub>O annual emissions to become visible on the chart. One more series, i.e. that for Zour North Power Station (ZNPS), was added to this chart. The units at ZNPS do not belong to MEW, still, their GHGs emissions were added to illustrate the lower contribution of these units to GHGs emissions. Figure S10 shows the results obtained for Doha West Power Station (DWPS). Four scenarios were considered for this station:

- the GTUs rely entirely on GO while the thermal units rely entirely on HFO,
- the GTUs rely entirely on NG while the thermal units rely entirely on HFO,
- the GTUs rely entirely on GO while the thermal units rely entirely on FO, and
- the GTUs rely entirely on NG while the thermal units rely entirely on FO.

The calculated annual CO<sub>2</sub> emissions ranged between 14.6 x 10<sup>6</sup> tons for scenario 2 to 15.3 x 10<sup>6</sup> tons for scenario 3 for the stoichiometric equations calculation method. As for the results obtained using the US-EPA emission factors, the annual CO<sub>2</sub> emissions ranged between 13.7E06 tons for scenario 2 to 15.8 x 10<sup>6</sup> tons for scenario 3. When the emission factors of the Ecometrica (Kuwait specific), US-Average for electricity sector, and the IEA Electricity (Kuwait specific) were used, the annual CO<sub>2</sub> emissions were 14.2 x 10<sup>6</sup>, 12.4 x 10<sup>6</sup> and 17.6 x 10<sup>6</sup> tons, respectively, with no difference in the results of different scenarios. Finally, the IPCC calculations resulted in annual CO<sub>2</sub> emissions ranging between 15.0 x 10<sup>6</sup> tons for Scenario 2 and 15.4 x 10<sup>6</sup> tons for scenario 3, refer to Figure S10. Using the IPCC results as a base, Figure S11 shows the results obtained using the stoichiometric equations calculation method had the smallest percentage error (i.e., average error = 1.83%) while those obtained using the emission factors of US-EPA, the Ecometrica (Kuwait specific), the US-Average electricity sectors, and the IEA (Kuwait specific) had average percentage errors of 2.83, 6.69, 18.16, and 15.67%, respectively.

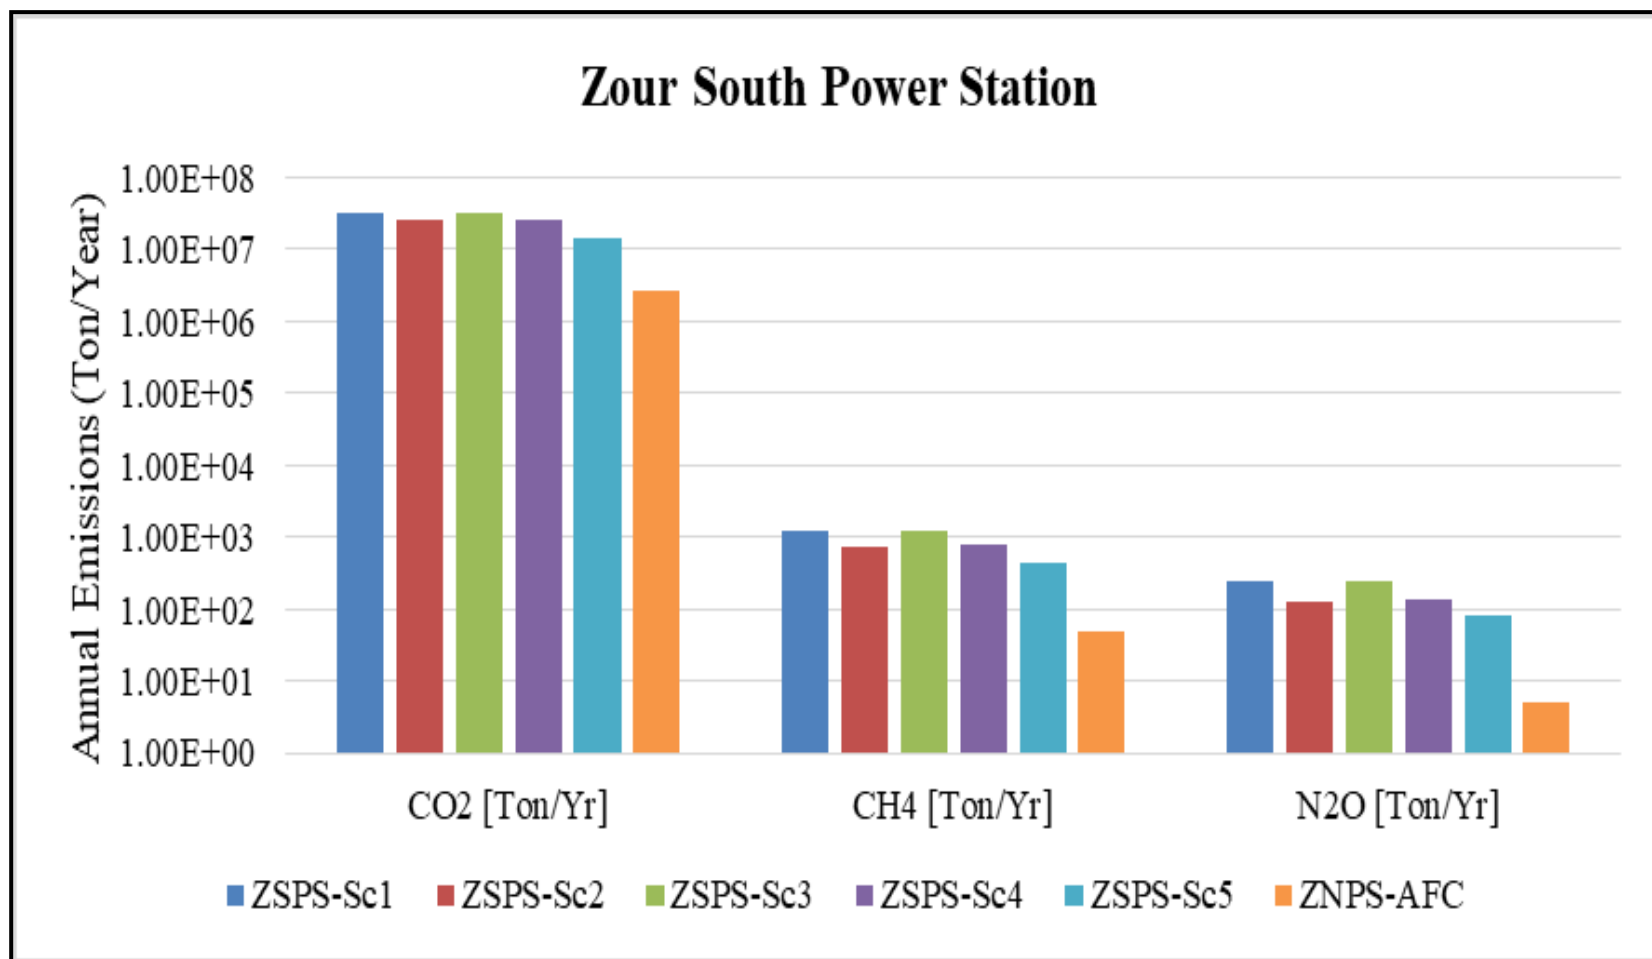

Figure S9. The annual CO<sub>2</sub>, CH<sub>4</sub>, and N<sub>2</sub>O emissions for Zour South Power Station based on the available possible scenarios using different calculation methods.

Notes: US-EPA: United States Environment Protection Agency, IEA: International Energy Agency, IPCC: Intergovernmental Panel on Climate Change, ZSPS: Zour South Power Station, ZNPS: Zour North Power Station, Sc1: Scenario 1: GO + HFO, Sc2: Scenario 2: NG + HFO, Sc3: Scenario 3: GO + FO, Sc4: Scenario 4: NG + FO, Scenario 5: Actual Fuel Consumption, AFC: Actual Fuel Consumption.

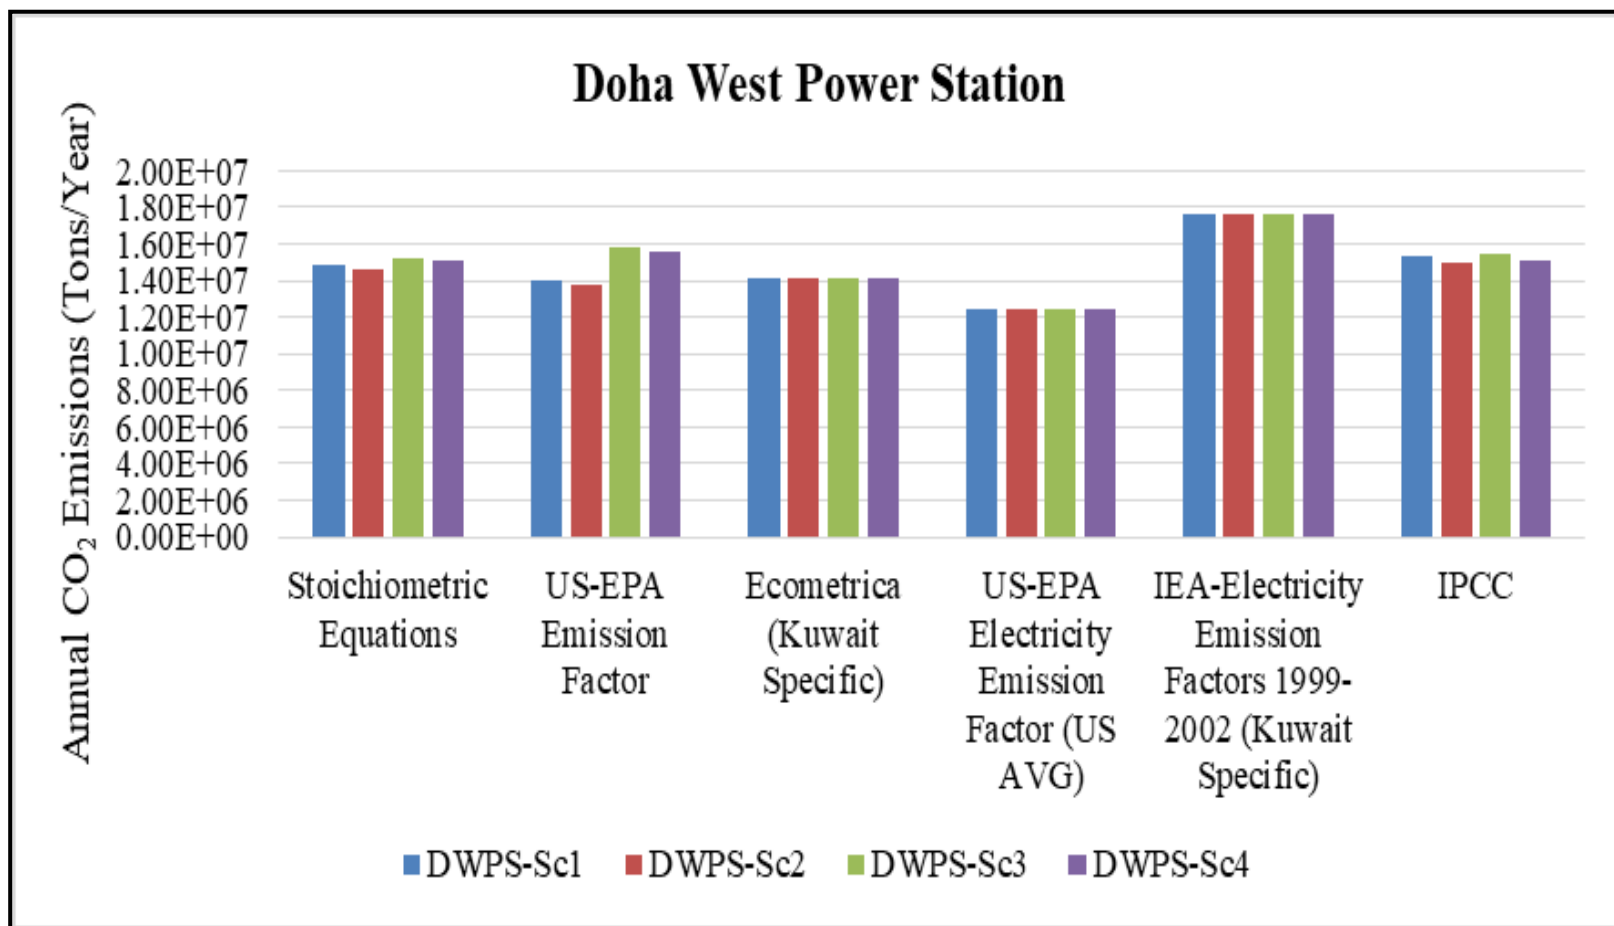

Figure S10. The annual CO<sub>2</sub> emissions for Doha West Power Station based on the available possible scenarios using different calculation methods.

Notes: US-EPA: United States Environment Protection Agency, IEA: International Energy Agency, IPCC: Intergovernmental Panel on Climate Change, DWPS: Doha West Power Station, Sc1: Scenario 1: GO + HFO, Sc2: Scenario 2: NG + HFO, Sc3: Scenario 3: GO + FO, Sc4: Scenario 4: NG + FO.

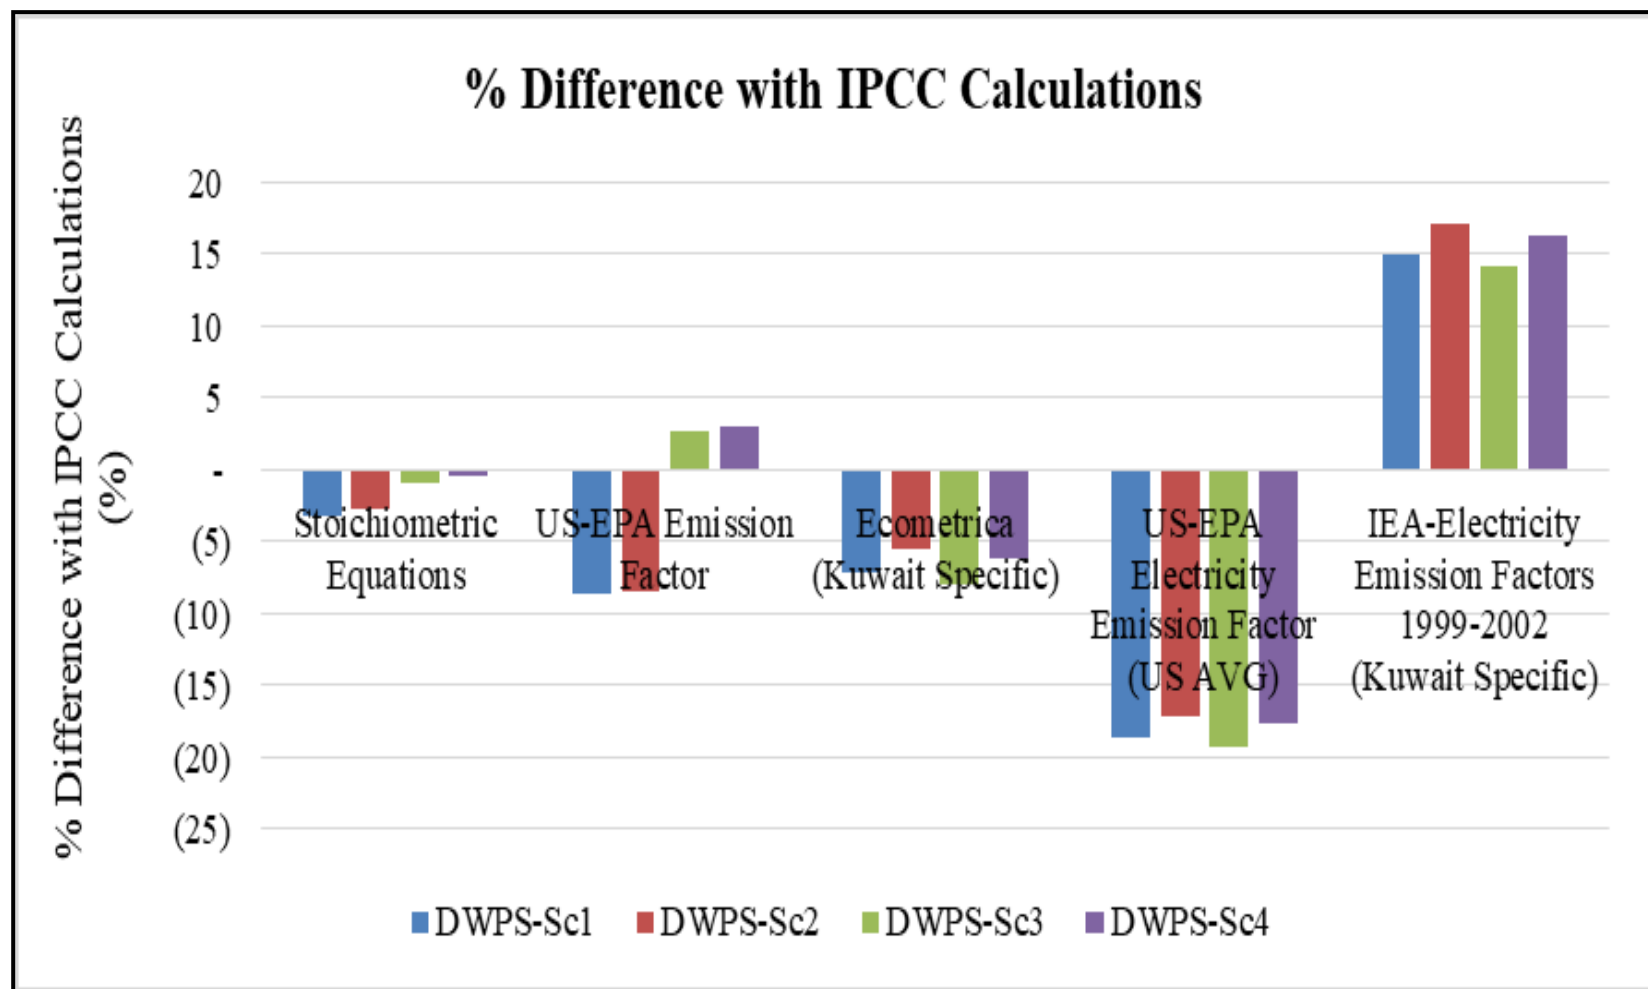

Figure S11. The percentage difference between the calculated annual CO<sub>2</sub> emissions for Doha West Power Station using different calculation methods and that of IPCC.

Notes: US-EPA: United States Environment Protection Agency, IEA: International Energy Agency, IPCC: Intergovernmental Panel on Climate Change, DWPS: Doha West Power Station, Sc1: Scenario 1: GO + HFO, Sc2: Scenario 2: NG + HFO, Sc3: Scenario 3: GO + FO, Sc4: Scenario 4: NG + FO.

Figure S12 shows the IPCC's results obtained for the above-listed four scenarios in addition to a fifth scenario reflecting the actual fuel consumed in 2016 as obtained by MEW. Obviously, a quick comparison between the emission values obtained for the five scenarios shows the emission rates for the 5<sup>th</sup> scenario as lowest confirming by which the fact the DWPS units were not fully utilized throughout the year. The reader's attention is brought to the fact the vertical axis in Figure S12 is logarithmic in style, a choice made to allow the relatively negligible CH<sub>4</sub> and N<sub>2</sub>O annual emissions to become visible on the chart. Figure S13 shows the results obtained for Doha East Power Station (DEPS). Four scenarios were considered for this station:

- the GTUs rely entirely on GO while the thermal units rely entirely on HFO,
- the GTUs rely entirely on NG while the thermal units rely entirely on HFO,
- the GTUs rely entirely on GO while the thermal units rely entirely on FO, and
- the GTUs rely entirely on NG while the thermal units rely entirely on FO.

The calculated annual CO<sub>2</sub> emissions ranged between  $6.6 \times 10^6$  tons for scenario 2 to  $6.9 \times 10^6$  tons for scenario 3 for the stoichiometric equations calculation method. As for the results obtained using the US-EPA emission factors, the annual CO<sub>2</sub> emissions ranged between  $6.2 \times 10^6$  tons for scenario 2 and  $7.2 \times 10^6$  tons for scenario 3. For the calculation methods relying on Ecometrica (Kuwait specific) emission factors, US-Average electricity emission factors, and the IEA Electricity emission factors (Kuwait specific), the annual CO<sub>2</sub> emissions were  $6.5 \times 10^6$ ,  $5.7 \times 10^6$  and  $8.0 \times 10^6$  tons, respectively, with no difference in the results of different scenarios. Finally, the IPCC calculations resulted in annual CO<sub>2</sub> emissions ranging between  $6.7 \times 10^6$  tons for Scenario 2 and  $7.0 \times 10^6$  tons for scenario 3, refer to Figure S14. Using the IPCC results as a base, Figure S14 shows the results obtained using the stoichiometric equations calculation method had the smallest percentage error (i.e., average error = 1.65%) while those obtained using the emission factors of US-EPA, the Ecometrica (Kuwait specific), the US-Average electricity sectors, and the IEA (Kuwait specific) had average percentage errors of 3.03, 5.92, 17.48 and 16.62%, respectively.

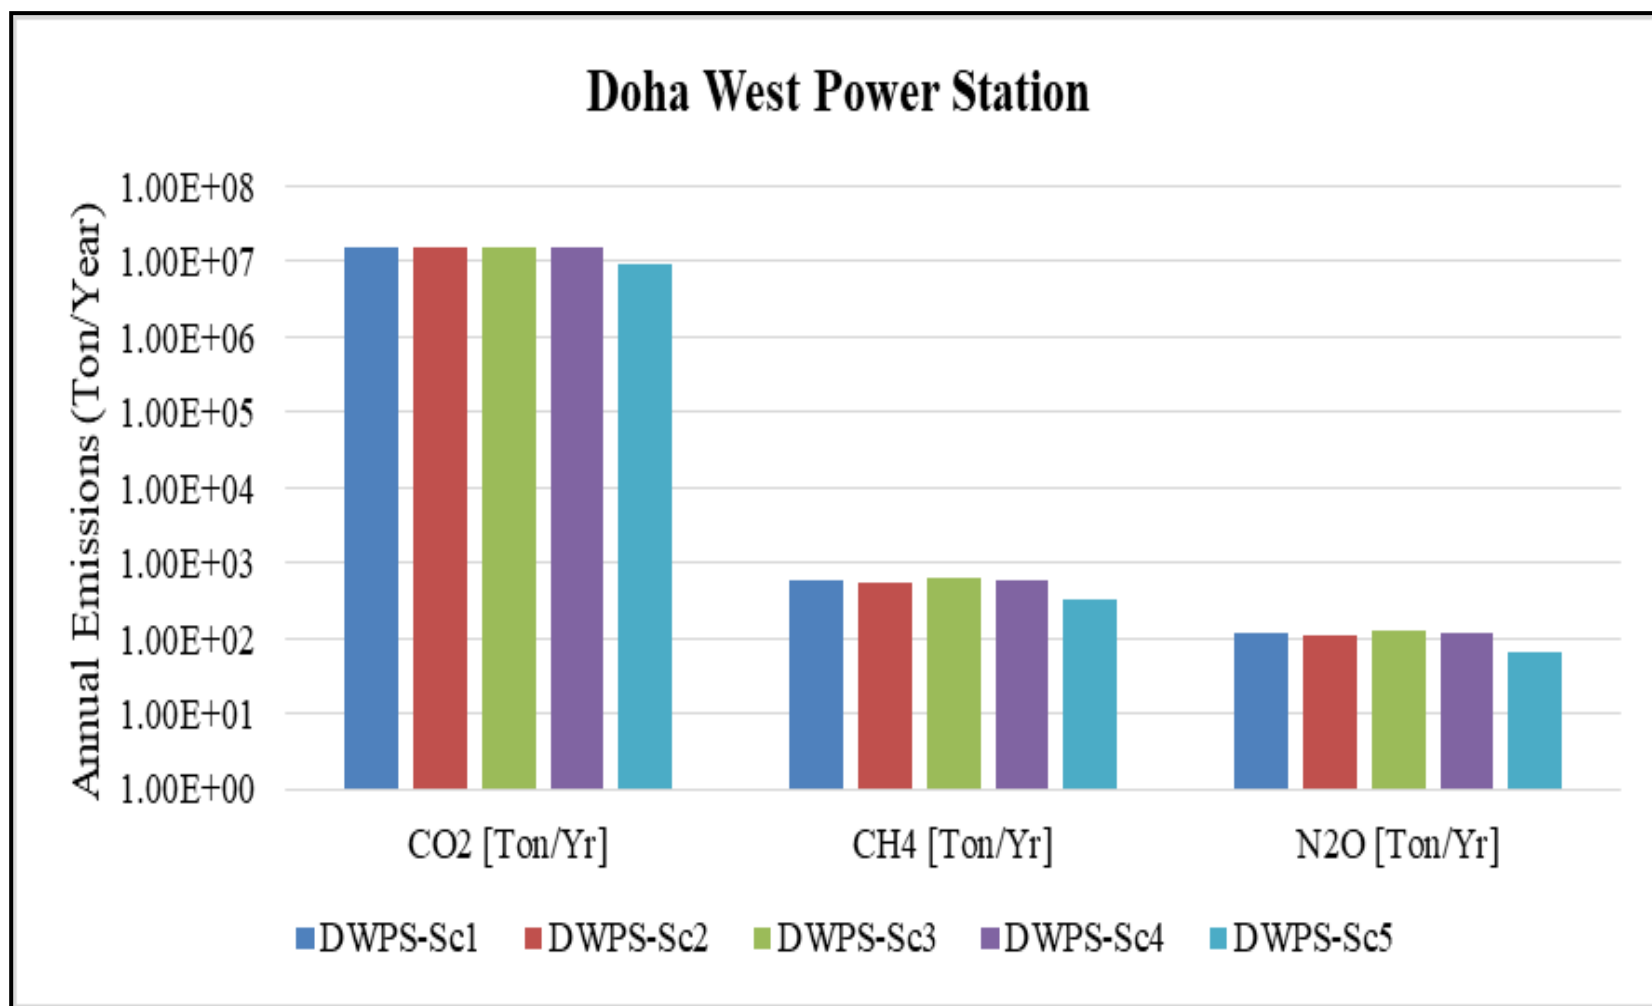

Figure S12 The annual CO<sub>2</sub>, CH<sub>4</sub>, and N<sub>2</sub>O emissions for Doha West Power Station based on the available possible scenarios using different calculation methods.

Notes: DWPS: Doha West Power Station, Sc1: Scenario 1: GO + HFO, Sc2: Scenario 2: NG + HFO, Sc3: Scenario 3: GO + FO, Sc4: Scenario 4: NG + FO, Sc5: Scenario 5: Actual Fuel Consumption.

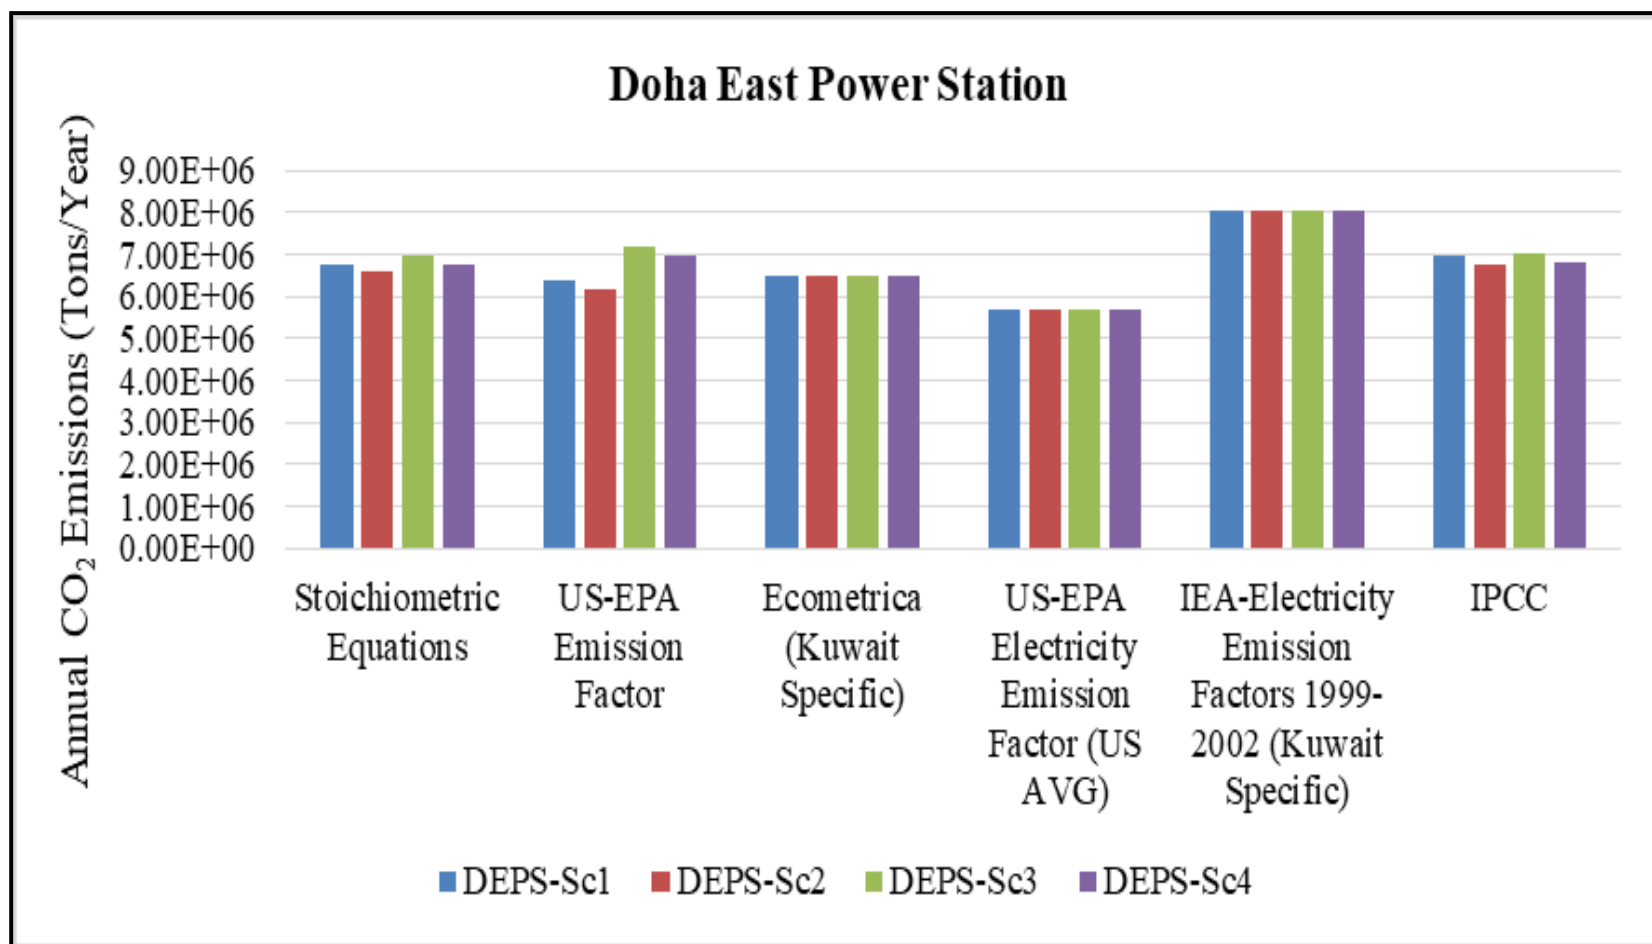

Figure S13 The annual CO<sub>2</sub> emissions for Doha East Power Station based on the available possible scenarios using different calculation methods.

Notes: US-EPA: United States Environment Protection Agency, IEA: International Energy Agency, IPCC: Intergovernmental Panel on Climate Change, DEPS: Doha East Power Station, Sc1: Scenario 1: GO + HFO, Sc2: Scenario 2: NG + HFO, Sc3: Scenario 3: GO + FO, Sc4: Scenario 4: NG + FO.

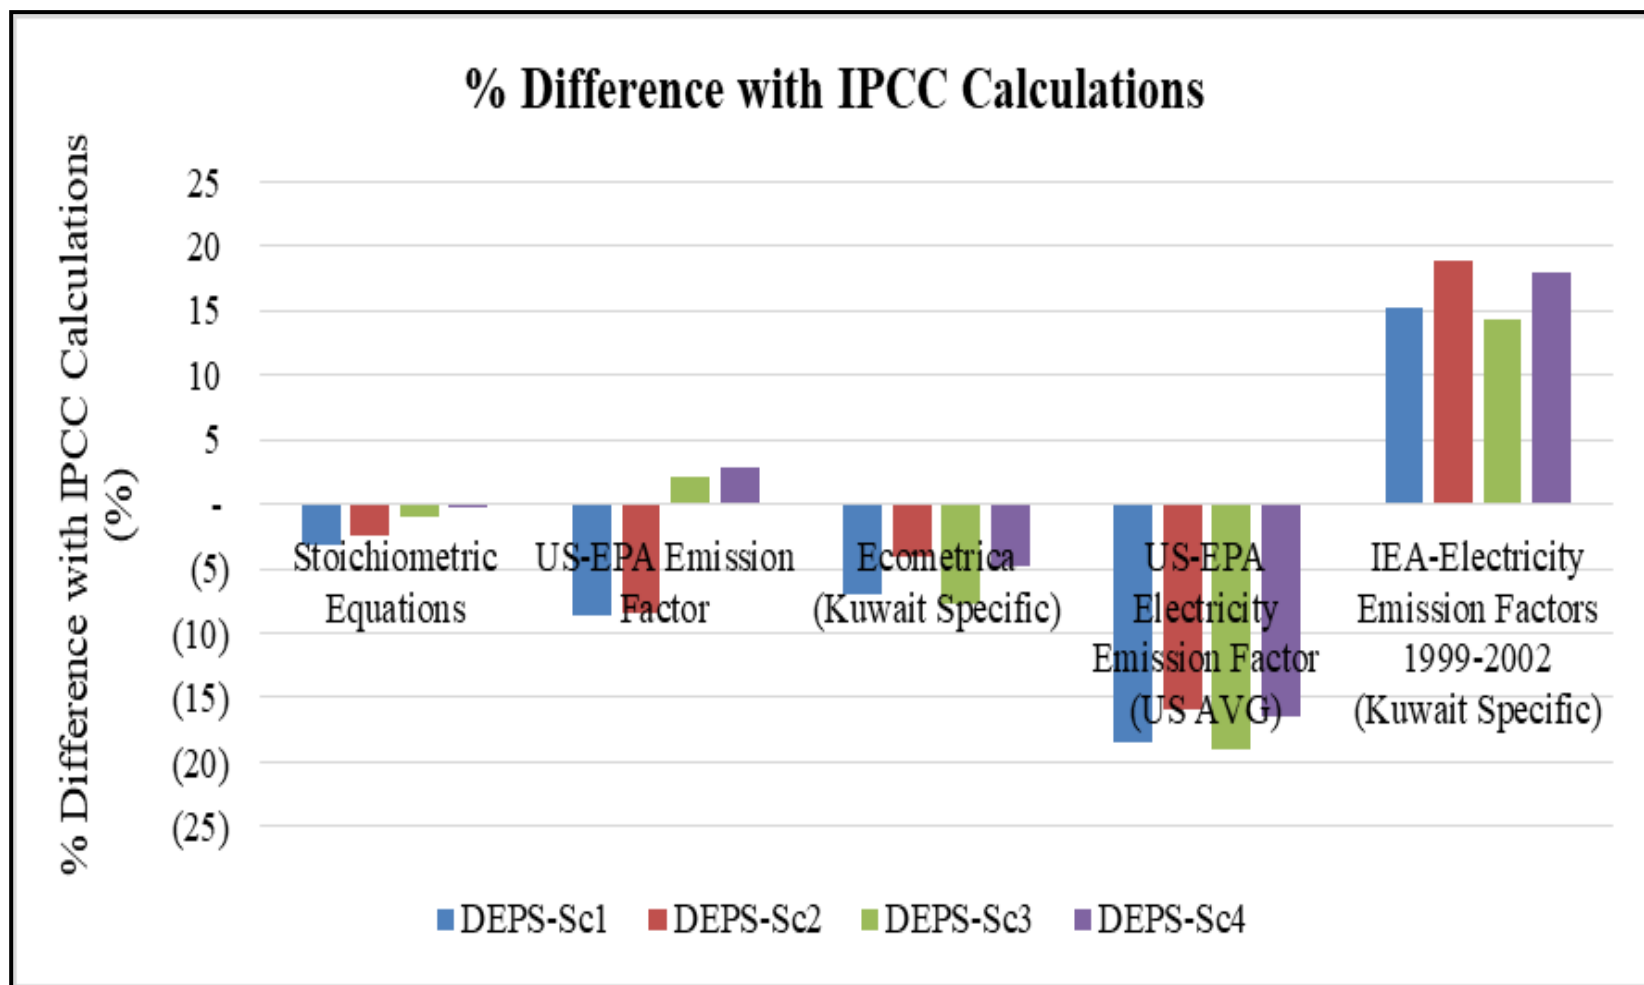

Figure S14. The percentage difference between the calculated annual CO<sub>2</sub> emissions for Doha East Power Station using different calculation methods and that of IPCC.

Notes: US-EPA: United States Environmental Protection Agency, IEA: International Energy Agency, IPCC: Intergovernmental Panel on Climate Change, DEPS: Doha East Power Station, Sc1: Scenario 1: GO + HFO, Sc2: Scenario 2: NG + HFO, Sc3: Scenario 3: GO + FO, Sc4: Scenario 4: NG + FO.

Figure S15 shows the IPCC's results obtained for the above-listed four scenarios in addition to a fifth scenario reflecting the actual fuel consumed in 2016 as obtained by MEW. Obviously, a quick comparison between the emission values obtained for the five scenarios confirms the fact the units were not fully utilized throughout the year. The reader's attention is brought to the fact the vertical axis in Figure S15 is logarithmic in style, a choice made to allow the relatively negligible CH<sub>4</sub> and N<sub>2</sub>O annual emissions to become visible on the chart. Figure S16 shows the results obtained for Shuwaikh Desalination Plant (SHDP). Two scenarios were considered for each station:

- the GTUs rely entirely on GO, and
- the GTUs rely entirely on NG.

For the stoichiometric equations method; the annual CO<sub>2</sub> emissions ranged between 1.4 x 10<sup>6</sup> tons for scenario 1 to 1.5 x 10<sup>6</sup> tons for scenario 2. As for the results obtained using the US-EPA emission factors, the annual CO<sub>2</sub> emissions ranged between 0.9 x 10<sup>6</sup> tons for scenario 2 and 1.3 x 10<sup>6</sup> tons for scenario 1. For the Ecometrica (Kuwait specific), US-Average electricity emission factors, and the IEA Electricity emission factors (Kuwait specific), the annual CO<sub>2</sub> emissions were 1.4 x 10<sup>6</sup>, 1.2 x 10<sup>6</sup> and 1.7 x 10<sup>6</sup> tons, respectively. Finally, the IPCC calculations resulted in annual CO<sub>2</sub> emissions ranging between 1.0E06 tons for Scenario 2 and 1.5 x 10<sup>6</sup> tons for scenario 1, refer to Figure S16. Figure S17 depicts the percentage error associated with each calculation method assuming the IPCC one was the reference. Figure S18 shows the IPCC's results obtained for the above-listed two scenarios in addition to a third one reflecting the actual fuel consumed in 2016 as obtained by MEW. Obviously, a quick comparison between the emission values obtained for the three scenarios confirms the fact the units were not fully utilized throughout the year. The reader's attention is brought to the fact the vertical axis in Figure S18 is logarithmic in style, a choice made to allow the relatively negligible CH<sub>4</sub> and N<sub>2</sub>O annual emissions to become visible on the chart.

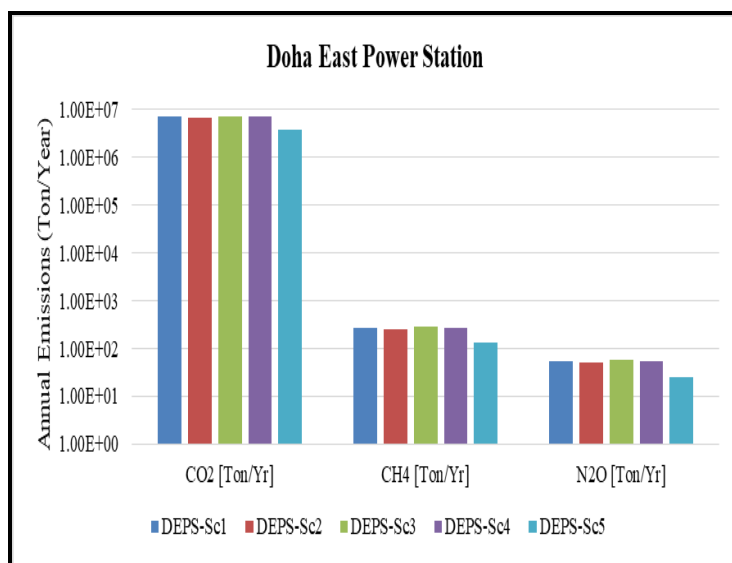

Figure S15. The annual CO<sub>2</sub>, CH<sub>4</sub>, and N<sub>2</sub>O emissions for Doha East Power Station based on the available possible scenarios using different calculation methods.

Notes: DEPS: Doha East Power Station, Sc1: Scenario 1: GO + HFO, Sc2: Scenario 2: NG + HFO, Sc3: Scenario 3: GO + FO, Sc4: Scenario 4: NG + FO, Sc5: Scenario 5: Actual Fuel Consumption.

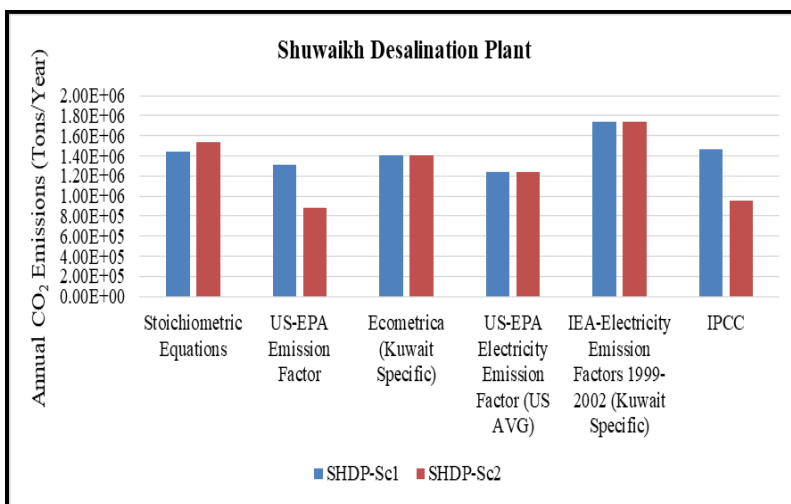

Figure S16. The annual CO<sub>2</sub> emissions for Shuwaikh Desalination Plant based on the available possible scenarios using different calculation methods.

Notes: US-EPA: United States Environment Protection Agency, IEA: International Energy Agency, IPCC: Intergovernmental Panel on Climate Change, SHDP: Shuwaikh Desalination Plant, Sc1: Scenario 1: GO, Sc2: Scenario 2: NG.

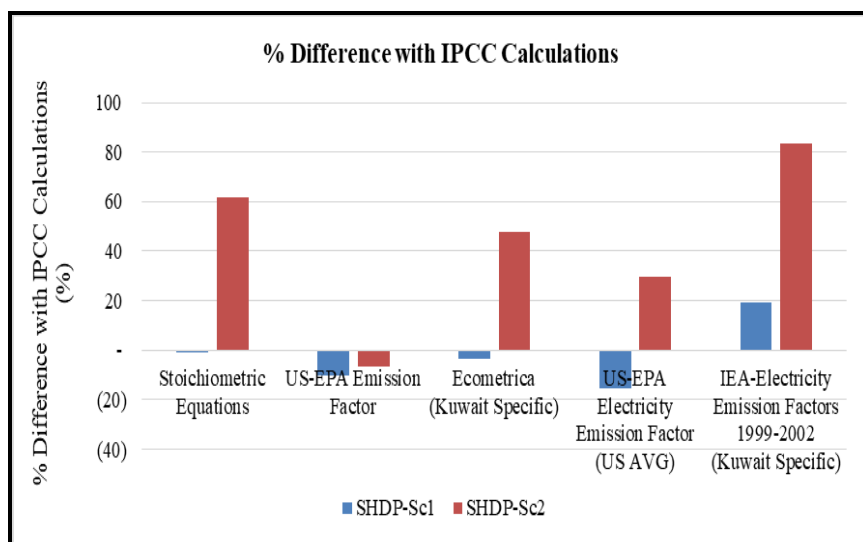

Figure S17. The percentage difference between the calculated annual CO<sub>2</sub> emissions for Shuwaikh Desalination Plant using different calculation methods and that of IPCC.

Notes: US-EPA: United States Environment Protection Agency, IEA: International Energy Agency, IPCC: Intergovernmental Panel on Climate Change, SHDP: Shuwaikh Desalination Plant, Sc1: Scenario 1: GO, Sc2: Scenario 2: NG.

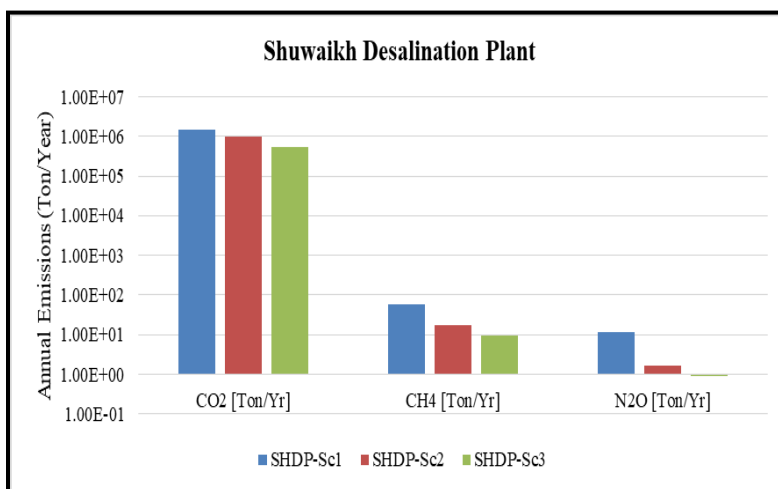

Figure S18. The annual CO<sub>2</sub>, CH<sub>4</sub>, and N<sub>2</sub>O emissions for Shuwaikh Desalination Plant based on the available possible scenarios using different calculation methods.

Notes: US-EPA: United States Environment Protection Agency, IEA: International Energy Agency, IPCC: Intergovernmental Panel on Climate Change, SHDP: Shuwaikh Desalination Plant, Sc1: Scenario 1: GO, Sc2: Scenario 2: NG, Sc3: Scenario 3: Actual Fuel Consumption.
